# Supplementary material for: Chikungunya in Indonesia: Epidemiology and diagnostic challenges
Source: PLoS Negl Trop Dis. 2020 Jun 1;14(6):e0008355. doi: 10.1371/journal.pntd.0008355 (PMC7289446; doi:10.1371/journal.pntd.0008355)
Supplement: S1 Data — (XLSX) [file pntd.0008355.s003.xlsx]

## Sheet: Sheet1
No.	City	Gender	Age (y.o.)	Visit Date	Pathogen Identified	Clinical diagnosis for CHIK Cases	Days of illness	Fatal
1	Bandung	1	3.11	2013-09-05	Streptococcus pneumoniae		5	Yes
2	Bandung	2	11.8	2013-09-05	Salmonella typhi		2	No
3	Bandung	2	6	2013-09-16	Salmonella typhi		8	No
4	Bandung	1	1	2013-09-17	UNK		1	No
5	Bandung	1	11.9	2013-10-02	Rickettsia typhi		6	No
6	Bandung	1	7.8	2013-10-16	Salmonella typhi		12	No
7	Bandung	1	1.5	2013-10-17	UNK		2	No
8	Bandung	1	13.9	2013-10-21	Salmonella typhi		10	No
9	Bandung	2	17.11	2013-10-24	DENV-3		6	No
10	Bandung	1	1.2	2013-10-24	UNK		3	Yes
11	Bandung	1	4.9	2013-10-31	DENV-3		6	No
12	Bandung	2	17.6	2013-11-01	Salmonella typhi		13	No
13	Bandung	1	1	2013-11-06	Chikungunya	Fever	2	No
14	Bandung	1	1.5	2013-11-07	UNK		2	No
15	Bandung	2	1.1	2013-11-19	UNK		3	No
16	Bandung	1	10.7	2013-11-21	Salmonella paratyphi A		4	No
17	Bandung	2	1.1	2013-11-22	Influenza A		5	No
18	Bandung	1	5.1	2013-11-28	UNK		4	No
19	Bandung	1	5.5	2013-12-04	UNK		1	No
20	Bandung	1	17.8	2013-12-10	Salmonella typhi		8	No
21	Bandung	1	12.2	2013-12-12	UNK		6	No
22	Bandung	2	17.4	2013-12-17	Streptococcus viridans		4	No
23	Bandung	2	6.1	2013-12-18	DENV-3		4	No
24	Bandung	1	4.5	2013-12-19	Salmonella typhi		Withdraw	No
25	Bandung	2	7.8	2013-12-23	Salmonella typhi		8	No
26	Bandung	2	13.7	2013-12-31	DENV-3		5	No
27	Bandung	1	5.1	2014-01-02	Salmonella typhi		9	No
28	Bandung	1	16.1	2014-01-15	DENV		5	No
29	Bandung	1	5.3	2014-01-23	DENV-3		5	No
30	Bandung	1	1.9	2014-02-07	UNK		4	No
31	Bandung	1	4.2	2014-03-13	UNK		7	No
32	Bandung	1	2.1	2014-03-18	RSV		4	No
33	Bandung	2	3.1	2014-03-19	Salmonella typhi		12	No
34	Bandung	2	5.9	2014-03-26	UNK		4	No
35	Bandung	1	14	2014-03-27	Rickettsia typhi		10	No
36	Bandung	2	10.9	2014-03-28	Salmonella typhi		7	No
37	Bandung	1	11.1	2014-04-04	UNK		7	No
38	Bandung	1	7.3	2014-04-10	Salmonella typhi		13	No
39	Bandung	1	1.1	2014-04-29	UNK		6	No
40	Bandung	2	5.1	2014-05-02	DENV		4	No
41	Bandung	2	9.1	2014-05-06	Salmonella typhi		7	No
42	Bandung	2	8.5	2014-05-21	DENV		4	No
43	Bandung	1	1.1	2014-05-22	RSV		5	No
44	Bandung	2	5.3	2014-06-02	UNK		3	No
45	Bandung	2	1.3	2014-06-04	Salmonella typhi		4	No
46	Bandung	2	4.2	2014-06-05	Rickettsia typhi		9	No
47	Bandung	2	1.11	2014-06-05	UNK		3	No
48	Bandung	2	10.1	2014-06-10	UNK		10	No
49	Bandung	1	1	2014-07-04	HHV-6		3	No
50	Bandung	2	9.1	2014-07-04	DENV-3		5	No
51	Bandung	2	6.6	2014-07-11	Salmonella typhi		10	No
52	Bandung	2	2.3	2014-07-16	DENV-1		3	No
53	Bandung	2	6	2014-07-17	Salmonella typhi		13	No
54	Bandung	2	14	2014-08-06	Escherichia coli		5	No
55	Bandung	2	16.11	2014-08-13	Chikungunya	Endocarditis	5	No
56	Bandung	1	11.1	2014-08-14	Salmonella typhi		5	No
57	Bandung	2	9	2014-08-14	Rickettsia typhi		4	No
58	Bandung	1	5	2014-08-27	UNK		3	No
59	Bandung	2	14.4	2014-08-28	DENV-3		6	No
60	Bandung	1	1	2014-08-29	RSV		5	No
61	Bandung	2	6.8	2014-09-04	Rickettsia typhi		7	No
62	Bandung	1	6.8	2014-09-09	DENV		5	No
63	Bandung	1	8.1	2014-09-15	Salmonella typhi		8	No
64	Bandung	2	16.4	2014-09-23	UNK		4	Yes
65	Bandung	2	6.8	2014-10-01	Salmonella typhi		12	No
66	Bandung	1	13.3	2014-10-16	DENV-2		5	No
67	Bandung	2	8.4	2014-10-21	Salmonella typhi		11	No
68	Bandung	2	3.5	2015-01-07	UNK		1	No
69	Bandung	1	7.4	2015-01-07	Salmonella typhi		3	No
70	Bandung	1	5.6	2015-01-13	Salmonella typhi		6	Yes
71	Bandung	2	10.1	2015-01-16	DENV-1		5	No
72	Bandung	1	7	2015-01-21	UNK		5	No
73	Bandung	2	10.1	2015-01-27	DENV-2		4	No
74	Bandung	2	7.6	2015-02-03	UNK		6	No
75	Bandung	2	10.2	2015-02-03	DENV-2&3		6	No
76	Bandung	1	7.9	2015-02-10	DENV-3		1	No
77	Bandung	1	5.8	2015-02-17	RSV		1	No
78	Bandung	1	2.6	2015-02-26	UNK		2	No
79	Bandung	2	1.1	2015-02-27	HHV-6		2	No
80	Bandung	2	7	2015-03-04	UNK		4	No
81	Bandung	2	4.6	2015-03-05	UNK		5	No
82	Bandung	2	11.2	2015-03-12	DENV-3		4	No
83	Bandung	2	9	2015-03-17	Influenza A		8	No
84	Bandung	1	2.9	2015-03-20	Influenza A		6	No
85	Bandung	1	1.9	2015-03-20	UNK		3	No
86	Bandung	2	13	2015-03-25	UNK		12	Yes
87	Bandung	1	4.9	2015-04-02	UNK		6	No
88	Bandung	2	1.3	2015-04-02	UNK		6	No
89	Bandung	2	4.4	2015-04-08	DENV-3		3	No
90	Bandung	2	6.7	2015-04-13	Salmonella typhi		10	No
91	Bandung	1	11.8	2015-04-16	DENV		10	No
92	Bandung	1	3.6	2015-05-05	DENV-2		3	No
93	Bandung	2	13.1	2015-06-11	DENV-3		3	No
94	Bandung	1	10.3	2015-06-12	UNK		9	No
95	Bandung	2	8.4	2015-06-24	DENV		7	No
96	Bandung	2	12.3	2015-07-08	UNK		1	No
97	Bandung	2	8.3	2015-08-27	UNK		3	No
98	Bandung	1	3.1	2015-08-28	UNK		12	No
99	Bandung	1	15.9	2015-10-07	Salmonella typhi		8	No
100	Bandung	2	7.2	2015-10-23	UNK		3	No
101	Bandung	2	17.3	2015-11-16	Salmonella typhi		6	No
102	Bandung	2	3.5	2015-11-18	Influenza B		4	No
103	Bandung	2	15.11	2015-11-25	Rickettsia typhi		8	No
104	Bandung	1	1	2015-12-14	UNK		4	No
105	Bandung	2	3.9	2015-12-22	UNK		5	No
106	Bandung	1	14.6	2016-01-07	Salmonella typhi		10	No
107	Bandung	1	2.1	2016-01-11	DENV-1		6	No
108	Bandung	1	15	2016-01-20	DENV-4		6	No
109	Bandung	2	5.11	2016-02-16	DENV		5	No
110	Bandung	2	7.9	2016-03-08	UNK		1	No
111	Bandung	1	13.5	2016-03-17	DENV-2		3	No
112	Bandung	1	7.1	2016-03-24	DENV-3		10	No
113	Bandung	1	8.8	2016-04-01	DENV-3		2	No
114	Bandung	1	16.6	2016-04-05	DENV-1		3	No
115	Bandung	1	8	2016-05-17	DENV-2		3	No
116	Bandung	1	17.7	2016-06-17	DENV-3		5	No
117	Bandung	2	56	2013-09-09	UNK		8	Yes
118	Bandung	1	40.4	2013-09-10	Influenza A		1	No
119	Bandung	2	26.3	2013-09-12	Staphylococcus aureus		8	No
120	Bandung	1	21.8	2013-09-16	DENV-1		4	No
121	Bandung	2	35.4	2013-10-03	Streptococcus pneumoniae		13	No
122	Bandung	1	58.7	2013-10-22	UNK		4	No
123	Bandung	1	20.5	2013-10-28	DENV-2		4	No
124	Bandung	1	40.8	2013-10-31	Ascaris lumbricoides		5	Yes
125	Bandung	2	58.1	2013-11-01	UNK		1	No
126	Bandung	1	25.2	2013-11-06	Rickettsia typhi		7	No
127	Bandung	2	22.3	2013-11-12	DENV-3		5	No
128	Bandung	1	78.4	2013-11-13	UNK		2	No
129	Bandung	2	45.3	2013-11-15	UNK		4	No
130	Bandung	1	44.1	2013-11-20	DENV-3		3	No
131	Bandung	2	22.3	2013-12-09	DENV-3		4	No
132	Bandung	2	66.5	2013-12-13	Rickettsia typhi		8	No
133	Bandung	2	71.4	2013-12-17	Chikungunya	Dengue	2	No
134	Bandung	2	47.2	2013-12-24	UNK		8	No
135	Bandung	1	26.2	2014-01-03	Leptospira		6	No
136	Bandung	1	24.4	2014-01-07	Rickettsia typhi		8	No
137	Bandung	2	19.2	2014-01-09	Salmonella typhi		13	No
138	Bandung	1	52.9	2014-01-17	Influenza A		3	No
139	Bandung	2	20.7	2014-01-28	DENV-3		6	No
140	Bandung	2	21.7	2014-01-29	DENV-3		5	No
141	Bandung	2	19.1	2014-02-07	Salmonella typhi		10	No
142	Bandung	1	29.7	2014-02-14	UNK		8	No
143	Bandung	2	30.5	2014-02-17	UNK		8	Yes
144	Bandung	2	74.6	2014-02-28	Escherichia coli		4	No
145	Bandung	1	35.8	2014-03-04	DENV-3		5	No
146	Bandung	1	21.8	2014-03-05	Rickettsia typhi		7	No
147	Bandung	2	31.5	2014-03-11	UNK		3	No
148	Bandung	2	38.2	2014-03-12	Leptospira		6	No
149	Bandung	1	31.9	2014-04-01	DENV-3		2	No
150	Bandung	2	30.9	2014-04-16	UNK		4	No
151	Bandung	1	45.9	2014-04-30	DENV		3	No
152	Bandung	2	55.2	2014-04-30	Rickettsia typhi		6	No
153	Bandung	2	55.3	2014-05-02	Leptospira		6	No
154	Bandung	2	80.9	2014-05-13	UNK		5	No
155	Bandung	2	51	2014-05-16	UNK		5	No
156	Bandung	2	28.6	2014-05-22	DENV-3		7	No
157	Bandung	2	38.4	2014-05-28	DENV		7	No
158	Bandung	2	25.3	2014-05-28	UNK		11	No
159	Bandung	1	56.11	2014-06-03	Chikungunya	Viral infection	5	No
160	Bandung	2	47.8	2014-06-09	Rickettsia typhi		7	No
161	Bandung	1	56.7	2014-06-13	UNK		9	No
162	Bandung	1	28.11	2014-06-13	Chikungunya	Viral infection	2	No
163	Bandung	2	72	2014-06-17	Leptospira		5	No
164	Bandung	2	21.7	2014-07-03	UNK		3	No
165	Bandung	2	20.11	2014-07-16	Chikungunya	Rash	1	No
166	Bandung	1	40.5	2014-07-18	Leptospira		10	No
167	Bandung	1	62.5	2014-08-05	Mycobacterium tuberculosis		2	Yes
168	Bandung	2	68.11	2014-08-07	Influenza A H3N2		3	No
169	Bandung	1	41.2	2014-08-07	Leptospira		6	No
170	Bandung	2	87.1	2014-08-14	Klebsiella pneumoniae		3	No
171	Bandung	2	71.7	2014-08-20	UNK		2	No
172	Bandung	2	34.3	2014-08-21	UNK		7	No
173	Bandung	1	24.1	2014-08-22	Rickettsia typhi		6	No
174	Bandung	1	23.4	2014-09-04	DENV		5	No
175	Bandung	1	39.9	2014-09-04	Acinetobacter baumanii		3	No
176	Bandung	1	40.5	2014-09-05	Streptococcus pneumoniae		6	No
177	Bandung	2	53.4	2014-09-09	Escherichia coli		5	No
178	Bandung	2	32.1	2014-09-16	Streptococcus pneumoniae		6	No
179	Bandung	2	32.3	2014-09-17	Streptococcus pneumoniae		2	No
180	Bandung	2	35.8	2014-09-18	UNK		1	No
181	Bandung	2	32.11	2014-09-19	UNK		2	No
182	Bandung	2	19	2014-09-23	DENV		4	No
183	Bandung	1	39.1	2014-09-25	DENV-4		3	No
184	Bandung	1	76	2014-09-29	Enterobacter cloacae		4	No
185	Bandung	1	19.1	2014-10-14	UNK		2	No
186	Bandung	2	24.4	2014-10-17	UNK		10	No
187	Bandung	1	42.7	2014-10-17	UNK		4	No
188	Bandung	1	28.5	2014-10-24	Rickettsia typhi		6	No
189	Bandung	1	38.6	2014-10-24	Rickettsia typhi		8	No
190	Bandung	2	19.1	2014-10-28	Salmonella typhi		10	No
191	Bandung	2	55.4	2014-10-28	DENV-3		4	No
192	Bandung	1	22.8	2014-10-30	Streptococcus pneumoniae		8	No
193	Bandung	1	19.7	2014-11-06	UNK		5	Yes
194	Bandung	2	73.8	2014-11-12	Pseudomonas cepacea		2	No
195	Bandung	1	49.4	2014-11-13	Chikungunya	Typhoid fever	2	No
196	Bandung	1	53.6	2014-11-25	UNK		12	Yes
197	Bandung	2	32.4	2014-12-08	UNK		7	Yes
198	Bandung	1	53.7	2014-12-12	Salmonella sp		7	Yes
199	Bandung	2	62.9	2014-12-12	UNK		7	No
200	Bandung	1	41.6	2014-12-18	Mycobacterium tuberculosis		1	Yes
201	Bandung	2	49.3	2014-12-19	UNK		1	No
202	Bandung	2	29.1	2014-12-24	UNK		3	No
203	Bandung	1	65	2014-12-24	UNK		4	No
204	Bandung	2	33.6	2014-12-30	UNK		5	No
205	Bandung	1	26.7	2015-01-20	Leptospira		3	No
206	Bandung	1	56	2015-02-04	Salmonella typhi		4	No
207	Bandung	1	70	2015-02-05	Chikungunya	Respiraory infection	2	No
208	Bandung	2	68.6	2015-02-10	UNK		2	No
209	Bandung	1	42.7	2015-02-17	Rickettsia typhi		5	No
210	Bandung	1	69.5	2015-02-24	UNK		1	No
211	Bandung	1	66.1	2015-03-02	Influenza A H3N2		4	No
212	Bandung	1	55.1	2015-03-03	DENV-3		3	No
213	Bandung	2	19.7	2015-03-13	DENV-1		5	No
214	Bandung	1	24.6	2015-03-26	Chikungunya	Viral infection	4	No
215	Bandung	2	54.3	2015-03-27	UNK		13	No
216	Bandung	1	23.1	2015-03-27	Chikungunya	Viral infection	2	No
217	Bandung	2	40.8	2015-04-02	UNK		4	No
218	Bandung	1	77.1	2015-04-02	UNK		5	Yes
219	Bandung	2	52.6	2015-04-15	Salmonella typhi		1	No
220	Bandung	2	30.7	2015-04-21	Rickettsia typhi		7	No
221	Bandung	1	36	2015-04-28	DENV-3		4	No
222	Bandung	1	33.2	2015-05-05	Influenza A		2	No
223	Bandung	2	65.1	2015-05-05	Acinetobacter baumanii		4	No
224	Bandung	1	53.6	2015-05-05	Rickettsia typhi		8	No
225	Bandung	1	27	2015-05-22	Rickettsia typhi		9	No
226	Bandung	2	27.9	2015-06-09	Amoeba		2	No
227	Bandung	1	63.11	2015-06-23	Acinetobacter baumanii		3	Yes
228	Bandung	2	20.1	2015-06-23	DENV-3		5	No
229	Bandung	1	48	2015-06-29	UNK		11	No
230	Bandung	2	28	2015-07-10	Klebsiella pneumoniae		2	No
231	Bandung	2	26	2015-07-28	DENV-4		5	No
232	Bandung	1	18.9	2015-07-31	DENV-1		4	No
233	Bandung	2	61.3	2015-08-11	Escherichia coli		2	No
234	Bandung	1	32	2015-08-27	DENV-1		5	No
235	Bandung	1	26.3	2015-09-07	DENV-2		4	No
236	Bandung	1	29.7	2015-09-23	Mycobacterium tuberculosis		4	No
237	Bandung	1	23.6	2015-10-02	DENV-3		2	No
238	Bandung	1	23.3	2015-10-15	Influenza A		6	No
239	Bandung	2	24.8	2015-10-16	DENV-1		5	No
240	Bandung	2	62.3	2015-10-19	Escherichia coli		2	Yes
241	Bandung	2	43.3	2015-10-21	UNK		6	No
242	Bandung	2	59	2015-11-04	UNK		2	No
243	Bandung	2	72.9	2015-11-06	UNK		6	Yes
244	Bandung	1	28.2	2015-11-13	Influenza B		2	No
245	Bandung	1	33.5	2015-11-18	DENV-3		5	No
246	Bandung	1	21.5	2015-11-25	Salmonella typhi		5	No
247	Bandung	1	19.4	2015-11-26	DENV-3		4	No
248	Bandung	1	43.9	2016-01-05	UNK		5	No
249	Bandung	2	65	2016-01-05	Rickettsia typhi		5	No
250	Bandung	1	26.11	2016-01-29	DENV-3		6	No
251	Bandung	1	67.3	2016-02-02	UNK		5	Yes
252	Bandung	1	33.7	2016-02-04	DENV-3		4	No
253	Bandung	2	35.5	2016-02-16	DENV-3		3	No
254	Bandung	1	21.5	2016-02-24	DENV-3		3	No
255	Bandung	2	21.8	2016-02-26	DENV-1		3	No
256	Bandung	1	27.8	2016-03-02	DENV-1		4	No
257	Bandung	2	54.7	2016-03-03	Rickettsia typhi		3	Yes
258	Bandung	1	19.2	2016-03-03	Rickettsia typhi		9	No
259	Bandung	2	24	2016-04-19	UNK		1	No
260	Bandung	2	28.4	2016-04-20	DENV		6	No
261	Bandung	2	32.8	2016-05-11	DENV-3		7	No
262	Bandung	1	20.9	2016-05-20	UNK		2	No
263	Bandung	1	69.11	2016-05-27	DENV-3		9	No
264	Bandung	1	21.4	2016-06-08	DENV		6	No
265	Bandung	1	20.9	2016-06-14	DENV-2		6	No
266	Bandung	1	29.3	2016-06-15	DENV-2		3	No
267	Bandung	2	30.11	2016-06-30	DENV-3		4	No
268	Bandung	1	30.7	2013-07-19	DENV-1		4	No
269	Denpasar	1	15.8	2013-08-12	DENV-1		5	No
270	Denpasar	1	10.3	2013-08-20	DENV-1		3	No
271	Denpasar	1	6.4	2013-08-27	Ascaris lumbricoides, Trichuris Trichiura		3	No
272	Denpasar	2	13.1	2013-08-31	Influenza B		4	No
273	Denpasar	2	17.1	2013-09-02	DENV-1		4	No
274	Denpasar	2	7.11	2013-09-03	DENV-1		4	No
275	Denpasar	1	4.2	2013-09-23	Amoeba		1	No
276	Denpasar	1	13.4	2013-09-30	DENV-1		4	No
277	Denpasar	2	2.4	2013-10-09	UNK		5	No
278	Denpasar	1	13.2	2013-10-29	DENV-1		4	No
279	Denpasar	1	14.11	2013-11-07	Rickettsia typhi		6	No
280	Denpasar	1	14.11	2013-11-12	Klebsiella pneumoniae		7	No
281	Denpasar	1	1.3	2013-11-14	UNK		2	No
282	Denpasar	1	14.8	2013-11-22	DENV-1		5	No
283	Denpasar	1	15.7	2013-12-12	DENV-3		4	No
284	Denpasar	1	9.7	2014-01-15	DENV-1		7	No
285	Denpasar	2	17.8	2014-01-15	DENV-1		3	No
286	Denpasar	2	5.7	2014-01-24	DENV-3		5	No
287	Denpasar	2	6.1	2014-02-04	DENV-2		5	No
288	Denpasar	2	6.6	2014-02-05	DENV-1		6	No
289	Denpasar	2	2.5	2014-02-17	UNK		9	No
290	Denpasar	1	2.1	2014-02-20	UNK		1	No
291	Denpasar	1	16.7	2014-02-24	DENV		4	No
292	Denpasar	1	12	2014-02-27	DENV-1		5	No
293	Denpasar	1	10.7	2014-02-28	DENV-4		5	No
294	Denpasar	2	12.5	2014-03-22	DENV-1		3	No
295	Denpasar	2	17.5	2014-04-02	DENV-1		3	No
296	Denpasar	2	12.3	2014-04-08	DENV-1		3	No
297	Denpasar	1	14.9	2014-04-22	DENV-1		3	No
298	Denpasar	2	14.2	2014-04-23	DENV-3		4	No
299	Denpasar	2	16.11	2014-04-23	UNK		4	No
300	Denpasar	1	15.2	2014-06-30	DENV-1		3	No
301	Denpasar	1	17.9	2014-07-08	DENV-3		4	No
302	Denpasar	1	17.5	2014-07-12	DENV-1		4	No
303	Denpasar	1	14.7	2014-07-17	DENV-3		4	No
304	Denpasar	1	17.2	2014-07-17	DENV-1		5	No
305	Denpasar	2	17.9	2014-07-23	DENV-1		5	No
306	Denpasar	1	15.11	2014-09-08	UNK		2	No
307	Denpasar	1	13.3	2014-10-23	Staphylococcus aureus		4	No
308	Denpasar	2	16.1	2015-02-27	DENV-3		4	No
309	Denpasar	1	15.2	2015-03-18	DENV-2		2	No
310	Denpasar	1	14.1	2015-03-23	DENV-3		4	No
311	Denpasar	2	15.2	2015-04-29	DENV-3		4	No
312	Denpasar	2	10.6	2015-06-12	UNK		6	No
313	Denpasar	1	13.3	2015-06-29	DENV-3		4	No
314	Denpasar	1	8.2	2015-09-10	UNK		9	No
315	Denpasar	2	5.2	2015-09-10	UNK		9	No
316	Denpasar	2	17.4	2015-12-11	DENV-3		5	No
317	Denpasar	1	15.7	2016-01-13	DENV-1		5	No
318	Denpasar	2	16.11	2016-03-11	DENV-2		3	No
319	Denpasar	1	15.11	2016-05-25	DENV		5	No
320	Denpasar	1	17.6	2016-06-24	DENV-3		6	No
321	Denpasar	1	21.1	2013-07-18	Mycobacterium tuberculosis		1	No
322	Denpasar	1	22.5	2013-07-29	UNK		1	No
323	Denpasar	1	30.8	2013-08-01	UNK		15	No
324	Denpasar	1	26.1	2013-08-31	UNK		6	No
325	Denpasar	1	57.9	2013-09-06	Mycoplasma pneumoniae		2	No
326	Denpasar	2	18.6	2013-09-09	DENV-1		4	No
327	Denpasar	2	49.4	2013-09-12	Moraxella catarrhalis, Influenza B		3	Yes
328	Denpasar	2	33.8	2013-09-16	Streptococcus pneumoniae		2	No
329	Denpasar	2	37.8	2013-09-26	UNK		3	No
330	Denpasar	1	34.9	2013-10-01	UNK		6	No
331	Denpasar	1	52.9	2013-10-05	Escherichia coli		2	No
332	Denpasar	1	39.11	2013-10-14	Rickettsia typhi		8	No
333	Denpasar	1	22.8	2013-10-25	Measles virus		5	No
334	Denpasar	2	33.11	2013-10-31	UNK		8	Yes
335	Denpasar	1	27.1	2013-11-07	DENV-4		4	No
336	Denpasar	2	27.6	2013-11-14	UNK		3	No
337	Denpasar	1	51.1	2013-11-15	DENV-1		5	No
338	Denpasar	2	39.3	2013-11-21	UNK		3	No
339	Denpasar	1	29.4	2013-11-22	Amoeba		2	No
340	Denpasar	2	48.1	2013-11-25	UNK		15	No
341	Denpasar	2	55.2	2013-11-25	Enterococcus, Staphylococcus aureus		3	Yes
342	Denpasar	1	44.7	2013-11-27	Rickettsia typhi		11	No
343	Denpasar	1	29.6	2013-11-28	Escherichia coli		1	No
344	Denpasar	1	20.11	2013-12-02	DENV-2		4	No
345	Denpasar	2	50.11	2013-12-04	Streptococcus pyogenes		2	No
346	Denpasar	2	84.11	2013-12-05	Escherichia coli		8	No
347	Denpasar	1	70.1	2013-12-05	UNK		5	No
348	Denpasar	2	31.4	2013-12-09	Rickettsia typhi		8	No
349	Denpasar	1	51.5	2013-12-10	Staphylococcus aureus		4	No
350	Denpasar	1	27.1	2014-01-06	DENV-1		5	No
351	Denpasar	1	38	2014-01-07	Streptococcus pneumoniae		2	No
352	Denpasar	2	48	2014-01-14	Influenza A H1N1 pdm		5	No
353	Denpasar	2	31.9	2014-01-20	DENV-1		6	No
354	Denpasar	2	18.9	2014-01-21	DENV-1		4	No
355	Denpasar	2	44.11	2014-01-24	UNK		9	No
356	Denpasar	2	34.2	2014-02-03	Enterobacter aerogenes		2	No
357	Denpasar	1	22.8	2014-02-03	DENV-1		5	No
358	Denpasar	1	23.8	2014-02-04	Amoeba		4	No
359	Denpasar	2	21.5	2014-02-05	Measles virus		4	No
360	Denpasar	2	49.1	2014-02-10	Influenza A		8	Yes
361	Denpasar	1	18.4	2014-02-13	DENV-1		4	No
362	Denpasar	2	29.6	2014-02-14	Salmonella typhi		8	No
363	Denpasar	2	31.3	2014-02-15	DENV-1		5	No
364	Denpasar	1	22.2	2014-02-17	UNK		6	No
365	Denpasar	1	22.9	2014-02-17	DENV-2		6	No
366	Denpasar	1	40.5	2014-02-20	DENV-2		5	No
367	Denpasar	1	38.1	2014-02-24	UNK		3	No
368	Denpasar	1	22.7	2014-02-25	DENV-2		2	No
369	Denpasar	1	23.2	2014-03-05	DENV		5	No
370	Denpasar	1	22.1	2014-03-10	DENV-1		4	No
371	Denpasar	1	20.3	2014-03-10	DENV-1		3	No
372	Denpasar	1	22.2	2014-03-17	DENV-2		6	No
373	Denpasar	1	54.8	2014-03-20	DENV-1		2	No
374	Denpasar	1	27.7	2014-03-25	UNK		3	No
375	Denpasar	1	27.5	2014-04-03	DENV-1		5	No
376	Denpasar	1	36.8	2014-04-08	DENV-1		3	No
377	Denpasar	1	46.5	2014-04-17	DENV-1		4	No
378	Denpasar	2	20.1	2014-04-29	DENV		5	No
379	Denpasar	1	34.7	2014-05-13	DENV-3		4	No
380	Denpasar	1	32.2	2014-06-12	DENV		4	No
381	Denpasar	1	29.11	2014-06-14	DENV-1		3	No
382	Denpasar	1	24.8	2014-06-20	DENV-3		6	No
383	Denpasar	1	35.4	2014-06-27	DENV-2		4	No
384	Denpasar	1	34.7	2014-07-08	Streptococcus pneumoniae		8	Yes
385	Denpasar	1	48.8	2014-07-15	UNK		3	No
386	Denpasar	2	21.1	2014-08-08	DENV-3		4	No
387	Denpasar	1	21.2	2014-08-19	Amoeba		2	No
388	Denpasar	1	22.6	2014-08-22	DENV-1		5	No
389	Denpasar	2	27	2014-09-01	DENV-1		5	No
390	Denpasar	1	42.3	2014-09-05	UNK		5	No
391	Denpasar	1	43.8	2014-09-09	Enterobacter aerogenes		8	Yes
392	Denpasar	1	51.3	2014-09-25	UNK		2	No
393	Denpasar	2	34.11	2014-10-17	UNK		6	No
394	Denpasar	1	23	2014-10-30	DENV		4	No
395	Denpasar	1	31.5	2014-11-06	UNK		4	No
396	Denpasar	2	59.1	2014-11-10	UNK		2	No
397	Denpasar	1	23	2014-11-12	DENV-1		4	No
398	Denpasar	1	22.2	2014-11-12	Rickettsia typhi		8	No
399	Denpasar	2	59.1	2014-11-15	Entamoeba histolytica		2	No
400	Denpasar	1	61.5	2014-11-18	Klebsiella pneumoniae		6	Yes
401	Denpasar	1	63.7	2014-11-19	UNK		8	No
402	Denpasar	2	48.1	2014-11-20	Rickettsia typhi		8	No
403	Denpasar	2	71.11	2014-12-04	Rickettsia typhi		6	No
404	Denpasar	1	50.1	2014-12-06	Escherichia coli		1	Yes
405	Denpasar	2	41.11	2014-12-24	Rickettsia typhi		6	No
406	Denpasar	1	23.8	2015-01-02	DENV-3		5	No
407	Denpasar	1	40.2	2015-01-09	Rickettsia typhi		4	No
408	Denpasar	1	34.11	2015-01-14	UNK		8	No
409	Denpasar	2	42.11	2015-01-22	UNK		3	No
410	Denpasar	1	40.5	2015-01-23	DENV-3		2	No
411	Denpasar	1	50.3	2015-01-26	UNK		8	No
412	Denpasar	1	36.9	2015-01-26	DENV-2		1	No
413	Denpasar	1	39.4	2015-01-28	DENV-3		4	No
414	Denpasar	1	39.1	2015-02-02	DENV-1		4	No
415	Denpasar	1	35.6	2015-02-02	DENV-1		3	No
416	Denpasar	2	49.9	2015-02-11	UNK		2	No
417	Denpasar	1	22.1	2015-02-18	DENV-3		5	No
418	Denpasar	1	21	2015-02-23	DENV-1		5	No
419	Denpasar	1	24.9	2015-03-27	DENV		5	No
420	Denpasar	2	35.3	2015-04-06	DENV-3		4	No
421	Denpasar	1	22.11	2015-04-11	DENV		4	No
422	Denpasar	1	18.5	2015-04-13	DENV-4		5	No
423	Denpasar	1	26.8	2015-04-16	DENV-1		4	No
424	Denpasar	1	19.2	2015-04-21	DENV-3		4	No
425	Denpasar	2	28.5	2015-04-29	UNK		8	No
426	Denpasar	2	19.4	2015-05-11	DENV		6	No
427	Denpasar	2	18.2	2015-05-18	UNK		3	No
428	Denpasar	1	30.2	2015-05-21	DENV-2		5	No
429	Denpasar	1	35.7	2015-05-25	UNK		5	No
430	Denpasar	2	26.1	2015-05-25	UNK		6	No
431	Denpasar	1	22.2	2015-06-04	DENV-3		3	No
432	Denpasar	1	31.6	2015-06-04	DENV-3		4	No
433	Denpasar	1	24.7	2015-06-11	DENV-3		4	No
434	Denpasar	1	36.6	2015-06-18	UNK		6	No
435	Denpasar	2	39.11	2015-06-18	DENV-3		5	No
436	Denpasar	1	34.2	2015-06-24	Influenza B		5	No
437	Denpasar	2	69.5	2015-06-24	UNK		2	No
438	Denpasar	2	21	2015-06-30	DENV-2		4	No
439	Denpasar	2	37.11	2015-07-10	DENV-3		4	No
440	Denpasar	2	31.2	2015-07-31	DENV-3		4	No
441	Denpasar	2	25.5	2015-08-19	UNK		6	No
442	Denpasar	2	22.5	2015-08-20	UNK		6	No
443	Denpasar	1	31.2	2015-08-25	Malaria		5	No
444	Denpasar	2	47.8	2015-09-01	UNK		4	No
445	Denpasar	2	19.4	2015-09-03	DENV		7	No
446	Denpasar	2	38.4	2015-10-09	Rickettsia typhi		6	No
447	Denpasar	1	45.8	2015-10-19	Rickettsia typhi		4	No
448	Denpasar	1	52.9	2015-10-30	Rickettsia typhi		4	No
449	Denpasar	2	42.7	2015-11-05	UNK		4	No
450	Denpasar	1	38.4	2015-11-10	Rickettsia typhi		3	No
451	Denpasar	1	28.3	2015-11-17	UNK		5	No
452	Denpasar	1	42.3	2015-11-19	Rickettsia typhi		11	No
453	Denpasar	1	23	2015-11-20	DENV-3		3	No
454	Denpasar	1	20.3	2015-12-03	Streptococcus pneumoniae		4	No
455	Denpasar	2	47.6	2015-12-14	UNK		4	No
456	Denpasar	2	25.6	2016-01-11	Salmonella typhi		7	No
457	Denpasar	2	43	2016-01-13	DENV-1		4	No
458	Denpasar	1	36.8	2016-01-16	DENV-3		4	No
459	Denpasar	2	42.6	2016-01-20	UNK		4	No
460	Denpasar	1	48.3	2016-01-25	Rickettsia typhi		7	No
461	Denpasar	2	57.2	2016-02-03	UNK		5	No
462	Denpasar	1	40.8	2016-02-04	Rickettsia typhi		5	No
463	Denpasar	1	51.7	2016-02-15	UNK		5	No
464	Denpasar	2	42.11	2016-02-26	DENV-3		2	No
465	Denpasar	1	19.6	2016-02-29	DENV-2		3	No
466	Denpasar	1	39.2	2016-03-03	DENV-3		5	No
467	Denpasar	1	43.6	2016-03-05	DENV-2		5	No
468	Denpasar	1	58.1	2016-03-11	Pseudomonas aeruginosa		2	No
469	Denpasar	1	23.4	2016-03-15	DENV-1		4	No
470	Denpasar	1	35.5	2016-03-18	DENV-3		4	No
471	Denpasar	1	36.3	2016-03-22	DENV-3		3	No
472	Denpasar	1	19.1	2016-03-29	DENV-2		5	No
473	Denpasar	1	54.1	2016-03-29	DENV-4		3	No
474	Denpasar	1	28.9	2016-04-06	DENV-3		4	No
475	Denpasar	1	40.3	2016-04-07	DENV-4		5	No
476	Denpasar	2	27.4	2016-04-22	DENV-3		5	No
477	Denpasar	2	19.1	2016-05-20	DENV-3		5	No
478	Denpasar	2	31.1	2016-05-24	UNK		2	No
479	Denpasar	2	45.6	2016-06-02	DENV-3		5	No
480	Denpasar	1	35.9	2016-06-10	DENV-3		4	No
481	Denpasar	1	28.7	2016-06-27	UNK		5	No
482	Jakarta	2	11.7	2015-01-22	DENV-1		5	No
483	Jakarta	2	5.7	2015-03-03	UNK		8	No
484	Jakarta	1	14.7	2015-03-26	DENV-3		2	No
485	Jakarta	1	14.2	2015-04-13	DENV		6	No
486	Jakarta	2	11.6	2015-05-07	UNK		11	Yes
487	Jakarta	2	14	2015-05-07	Salmonella typhi		8	No
488	Jakarta	1	13.8	2015-05-19	DENV-3		5	No
489	Jakarta	1	9	2015-06-18	Acinetobacter baumanii		5	No
490	Jakarta	2	5.3	2015-08-10	Salmonella typhi		9	No
491	Jakarta	2	2.8	2015-09-16	Influenza A		2	No
492	Jakarta	1	1.8	2015-10-08	UNK		4	No
493	Jakarta	2	3.9	2015-11-23	UNK		6	Yes
494	Jakarta	2	15.1	2015-12-23	UNK		7	No
495	Jakarta	2	3	2016-01-22	UNK		8	No
496	Jakarta	2	4.11	2016-02-13	DENV		4	No
497	Jakarta	1	11.1	2016-03-07	DENV		5	No
498	Jakarta	1	16.7	2016-03-14	DENV-3		4	No
499	Jakarta	1	4.2	2016-03-17	RSV		5	No
500	Jakarta	2	1.3	2016-03-21	Enterococcus faecalis		5	No
501	Jakarta	2	3.6	2016-03-22	Influenza A		4	No
502	Jakarta	1	14.1	2016-04-19	DENV-3		1	No
503	Jakarta	1	16.11	2016-04-29	DENV-1		3	No
504	Jakarta	1	13.6	2016-05-04	DENV-1		5	No
505	Jakarta	2	4.8	2016-06-29	DENV-3		4	No
506	Jakarta	2	33.4	2014-11-27	UNK		2	No
507	Jakarta	2	37.5	2014-12-03	UNK		8	No
508	Jakarta	1	28.4	2014-12-29	Staphylococcus aureus		6	No
509	Jakarta	2	56.4	2015-01-11	DENV-2		6	No
510	Jakarta	2	40.6	2015-01-13	DENV-3		6	No
511	Jakarta	1	56.11	2015-02-17	Rickettsia typhi		2	Yes
512	Jakarta	1	40.1	2015-02-22	Leptospira		5	No
513	Jakarta	2	67.4	2015-02-24	UNK		4	Yes
514	Jakarta	1	28	2015-02-25	Influenza A		15	No
515	Jakarta	2	47.2	2015-03-25	Staphylococcus haemolyticus		4	No
516	Jakarta	2	73.6	2015-04-16	UNK		2	No
517	Jakarta	1	58.9	2015-04-23	Leptospira		7	No
518	Jakarta	2	42.1	2015-05-11	Staphylococcus aureus		4	Yes
519	Jakarta	1	28.8	2015-05-20	DENV-3		3	No
520	Jakarta	2	75.5	2015-06-09	UNK		7	No
521	Jakarta	2	65	2015-06-17	UNK		1	No
522	Jakarta	2	63.8	2015-06-22	Streptococcus pneumoniae		7	No
523	Jakarta	1	57.6	2015-07-29	Rickettsia typhi		10	No
524	Jakarta	1	57.3	2015-08-13	UNK		3	No
525	Jakarta	2	21.5	2015-09-16	UNK		2	No
526	Jakarta	1	27.6	2015-09-16	UNK		2	No
527	Jakarta	2	35.5	2015-09-16	UNK		2	No
528	Jakarta	2	60.8	2015-09-18	UNK		3	No
529	Jakarta	2	62.9	2015-09-22	Klebsiella pneumoniae		1	No
530	Jakarta	1	38.5	2015-10-21	Rickettsia typhi		9	No
531	Jakarta	2	66	2015-11-12	UNK		4	No
532	Jakarta	2	62.8	2015-12-03	UNK		1	Yes
533	Jakarta	2	26.9	2015-12-23	UNK		4	No
534	Jakarta	1	30.2	2016-01-11	UNK		5	Yes
535	Jakarta	1	40	2016-01-26	Rickettsia typhi		13	Yes
536	Jakarta	1	29.7	2016-02-18	DENV-3		4	No
537	Jakarta	1	19.6	2016-02-25	DENV		4	No
538	Jakarta	1	27.4	2016-03-01	SEOUL VIRUS		6	No
539	Jakarta	2	24	2016-03-02	DENV-3		6	No
540	Jakarta	1	66.2	2016-03-10	UNK		2	No
541	Jakarta	1	76.9	2016-03-21	Influenza B		3	Yes
542	Jakarta	2	52.8	2016-04-04	RSV		3	Yes
543	Jakarta	1	19.5	2016-04-08	DENV-1		3	No
544	Jakarta	1	19.7	2016-04-12	UNK		1	No
545	Jakarta	2	19	2016-05-16	UNK		6	No
546	Jakarta	2	21.9	2016-06-13	DENV-1		4	No
547	Jakarta	1	1.1	2014-12-08	Amoeba		4	No
548	Jakarta	1	1.6	2014-12-08	Norovirus II		2	No
549	Jakarta	2	12.6	2015-01-29	Rickettsia typhi		5	No
550	Jakarta	2	10.9	2015-01-29	DENV-4		3	No
551	Jakarta	1	9.2	2015-02-02	UNK		3	No
552	Jakarta	1	6.6	2015-02-03	Measles virus		6	No
553	Jakarta	1	1.1	2015-02-17	UNK		5	No
554	Jakarta	2	4	2015-02-20	UNK		2	No
555	Jakarta	2	1.6	2015-02-20	Influenza A H3N2		8	No
556	Jakarta	1	7.3	2015-02-26	UNK		8	Yes
557	Jakarta	1	11.11	2015-02-26	Influenza A		9	No
558	Jakarta	1	6.9	2015-03-06	Salmonella typhi		8	No
559	Jakarta	1	2	2015-03-09	DENV-1		1	No
560	Jakarta	1	2.6	2015-03-09	DENV		5	No
561	Jakarta	1	15.1	2015-03-18	DENV-3		4	No
562	Jakarta	1	15.1	2015-03-18	UNK		5	No
563	Jakarta	1	2.3	2015-03-20	DENV-3		6	Yes
564	Jakarta	2	1.6	2015-04-01	HHV-6		4	No
565	Jakarta	2	10.11	2015-04-02	DENV-3		2	No
566	Jakarta	2	11.1	2015-04-07	DENV-1		3	No
567	Jakarta	1	3.1	2015-04-14	UNK		5	No
568	Jakarta	2	8.7	2015-05-11	Salmonella typhi		12	No
569	Jakarta	1	1.1	2015-05-11	UNK		2	No
570	Jakarta	1	13	2015-06-11	DENV-1		4	No
571	Jakarta	1	5.6	2015-06-25	DENV-2		5	No
572	Jakarta	2	9.5	2015-07-23	DENV-1		3	No
573	Jakarta	2	4	2015-08-24	Influenza A		4	No
574	Jakarta	2	1.1	2015-09-23	UNK		4	No
575	Jakarta	1	1.2	2015-09-25	Streptococcus pneumoniae		8	No
576	Jakarta	1	7.8	2015-10-05	UNK		6	No
577	Jakarta	1	3.6	2015-10-05	Influenza A		8	No
578	Jakarta	1	7.11	2015-11-03	Influenza A		7	No
579	Jakarta	1	2	2015-11-06	UNK		8	No
580	Jakarta	2	1.7	2015-11-20	UNK		4	No
581	Jakarta	2	3	2015-12-01	UNK		12	No
582	Jakarta	2	2.5	2015-12-06	UNK		4	No
583	Jakarta	1	4	2015-12-21	UNK		6	No
584	Jakarta	1	5.3	2015-12-21	UNK		4	No
585	Jakarta	1	9	2016-01-12	DENV-3		5	No
586	Jakarta	1	4.5	2016-02-27	DENV-3		4	No
587	Jakarta	1	6.8	2016-02-29	UNK		3	No
588	Jakarta	2	7.2	2016-02-29	Salmonella typhi		8	No
589	Jakarta	1	13.11	2016-03-17	DENV		4	No
590	Jakarta	2	7.1	2016-03-18	DENV-2		5	No
591	Jakarta	1	3.1	2016-03-22	DENV-3		8	No
592	Jakarta	2	1	2016-03-23	Measles virus		11	No
593	Jakarta	2	6.1	2016-03-23	DENV-3		3	No
594	Jakarta	2	6.6	2016-03-23	UNK		3	No
595	Jakarta	1	13.6	2016-03-29	DENV-3		2	No
596	Jakarta	1	7.8	2016-04-01	Influenza B		3	No
597	Jakarta	2	15.9	2016-04-02	DENV-3		4	No
598	Jakarta	2	7	2016-04-05	DENV-1		4	No
599	Jakarta	1	8.1	2016-04-05	DENV-3		4	No
600	Jakarta	1	11.1	2016-04-09	DENV-2		6	No
601	Jakarta	1	11.1	2016-04-21	DENV-4		4	No
602	Jakarta	1	3.2	2016-05-14	DENV-2		5	No
603	Jakarta	2	5	2016-05-14	UNK		4	No
604	Jakarta	2	4.11	2016-05-19	Measles virus		6	No
605	Jakarta	1	13.9	2016-05-19	DENV-4		4	No
606	Jakarta	2	11.1	2016-05-19	DENV-2		3	No
607	Jakarta	2	1.9	2016-06-11	Streptococcus pneumoniae		3	No
608	Jakarta	1	8.6	2016-06-11	UNK		4	No
609	Jakarta	2	5.6	2016-06-28	UNK		2	Yes
610	Jakarta	1	6	2016-06-29	DENV-3		6	No
611	Jakarta	1	14	2016-06-30	DENV-2		3	No
612	Jakarta	1	53.3	2015-01-05	Rickettsia typhi		9	No
613	Jakarta	2	42	2015-01-12	Escherichia coli		1	No
614	Jakarta	1	32.5	2015-01-27	DENV-1		6	No
615	Jakarta	1	24	2015-01-30	DENV-3		3	No
616	Jakarta	2	25	2015-02-20	DENV-3		4	No
617	Jakarta	1	58.1	2015-02-25	Leptospira		6	No
618	Jakarta	1	46.4	2015-03-27	Mycobacterium tuberculosis		15	No
619	Jakarta	1	24.6	2015-04-13	Hepatitis A		8	No
620	Jakarta	2	32.1	2015-05-19	UNK		6	No
621	Jakarta	1	20.9	2015-06-04	Rickettsia typhi		8	No
622	Jakarta	2	45.7	2015-11-04	Influenza A		2	No
623	Jakarta	1	36.2	2016-04-05	UNK		2	Yes
624	Jakarta	1	19.8	2016-04-09	DENV		8	No
625	Makassar	2	2.5	2013-11-13	Salmonella typhi		9	No
626	Makassar	2	2.6	2013-11-18	Influenza A		3	No
627	Makassar	1	16.1	2013-11-25	Hepatitis A		6	No
628	Makassar	1	6.4	2013-12-02	UNK		3	No
629	Makassar	2	17.1	2013-12-10	Influenza B		3	No
630	Makassar	1	17.1	2014-02-22	UNK		3	No
631	Makassar	2	5.8	2014-02-27	Salmonella typhi		10	No
632	Makassar	2	6.1	2014-03-03	UNK		6	No
633	Makassar	1	17.5	2014-03-13	HIV		8	Yes
634	Makassar	1	13.5	2014-03-15	DENV-3		3	No
635	Makassar	2	1.6	2014-04-10	UNK		2	No
636	Makassar	1	5.1	2014-04-14	UNK		2	No
637	Makassar	1	8.11	2014-04-17	UNK		1	No
638	Makassar	2	16.11	2014-07-21	Streptococcus pneumoniae		14	No
639	Makassar	2	11.11	2014-08-13	Streptococcus pneumoniae		2	Yes
640	Makassar	1	2	2014-09-05	UNK		8	No
641	Makassar	1	14.1	2014-09-15	UNK		14	No
642	Makassar	1	1.7	2014-10-20	UNK		1	No
643	Makassar	2	2	2014-10-29	UNK		2	No
644	Makassar	2	2.7	2014-11-03	UNK		9	No
645	Makassar	2	9.6	2014-11-14	UNK		2	No
646	Makassar	2	2	2014-12-15	DENV-3		2	No
647	Makassar	2	4.4	2014-12-23	DENV		5	No
648	Makassar	1	14.6	2014-12-29	DENV		5	No
649	Makassar	1	5.4	2015-01-09	UNK		4	No
650	Makassar	2	8.5	2015-02-07	Influenza B		6	No
651	Makassar	1	14.9	2015-02-11	Influenza B		4	No
652	Makassar	2	14.4	2015-03-06	Chikungunya	Respiraory infection	2	No
653	Makassar	1	7.1	2015-03-09	Influenza B		6	No
654	Makassar	1	15.3	2015-04-02	Leptospira		4	No
655	Makassar	1	4.2	2015-06-18	DENV-1		3	No
656	Makassar	2	7.4	2015-07-11	DENV		6	No
657	Makassar	2	8.8	2015-08-10	Salmonella typhi		8	No
658	Makassar	1	5.3	2015-08-28	UNK		3	No
659	Makassar	1	2.6	2015-09-14	UNK		1	No
660	Makassar	2	8.6	2016-01-06	DENV-1		4	No
661	Makassar	2	4.9	2016-01-07	chikungunya	Respiraory infection	2	No
662	Makassar	2	12.9	2016-02-11	DENV-1		4	No
663	Makassar	1	14.11	2016-02-11	DENV-1		4	No
664	Makassar	2	11.6	2016-02-15	DENV-3		2	No
665	Makassar	1	4.8	2016-02-19	DENV-1		3	No
666	Makassar	1	17.11	2016-02-19	Influenza A		15	No
667	Makassar	2	17.11	2016-03-01	DENV		3	No
668	Makassar	2	15.11	2016-03-03	DENV-4		3	No
669	Makassar	2	12	2016-04-28	DENV-4		3	No
670	Makassar	2	9.5	2016-05-14	DENV		6	No
671	Makassar	2	16.2	2016-05-17	DENV-3		2	No
672	Makassar	2	17.1	2016-05-19	DENV		4	No
673	Makassar	1	17.7	2016-05-21	DENV		5	No
674	Makassar	2	15.11	2016-05-21	DENV-2		2	No
675	Makassar	2	15.3	2016-06-02	DENV-4		5	No
676	Makassar	1	10.1	2016-06-02	DENV-3		5	No
677	Makassar	2	3.2	2016-06-24	DENV		2	No
678	Makassar	2	59.9	2013-10-16	UNK		8	No
679	Makassar	1	73.9	2013-10-21	UNK		3	No
680	Makassar	2	63.9	2013-11-11	Influenza A		1	No
681	Makassar	2	28.11	2013-11-12	Salmonella typhi		4	No
682	Makassar	1	23.1	2013-11-12	UNK		1	Yes
683	Makassar	2	18.3	2013-11-14	UNK		8	No
684	Makassar	2	22.9	2013-11-27	DENV-3		5	No
685	Makassar	1	28.7	2013-12-16	UNK		3	No
686	Makassar	1	47.11	2013-12-16	Mycobacterium tuberculosis		Onset date unknown	No
687	Makassar	1	34.8	2013-12-26	UNK		8	No
688	Makassar	2	55.11	2013-12-26	Rickettsia typhi		4	No
689	Makassar	2	22.6	2013-12-28	UNK		2	No
690	Makassar	1	43.1	2014-01-06	UNK		3	No
691	Makassar	2	19	2014-01-07	Influenza A		2	No
692	Makassar	1	39.9	2014-01-09	UNK		3	No
693	Makassar	2	18.1	2014-01-16	Influenza A		2	No
694	Makassar	1	25.8	2014-01-27	Measles virus		5	No
695	Makassar	1	56.11	2014-01-27	UNK		1	No
696	Makassar	1	48.8	2014-01-28	Enterococcus avium		6	Yes
697	Makassar	1	65.1	2014-02-01	UNK		2	No
698	Makassar	1	43.4	2014-02-04	Mycobacterium tuberculosis		8	No
699	Makassar	1	59.3	2014-02-04	Enterococcus faecalis		8	No
700	Makassar	1	18.3	2014-02-06	Influenza B		6	No
701	Makassar	1	21.1	2014-02-07	Leptospira		4	No
702	Makassar	1	32.1	2014-02-21	UNK		7	No
703	Makassar	1	33.8	2014-03-07	UNK		11	No
704	Makassar	2	21	2014-03-08	DENV		5	No
705	Makassar	1	25	2014-03-10	DENV-3		3	No
706	Makassar	2	47.1	2014-03-17	UNK		4	No
707	Makassar	1	19.5	2014-03-19	DENV-3		3	No
708	Makassar	1	35.5	2014-03-26	Salmonella typhi		10	No
709	Makassar	1	22.2	2014-03-28	Rickettsia typhi		4	No
710	Makassar	1	27.8	2014-04-02	Measles virus		5	No
711	Makassar	2	27.3	2014-04-04	DENV-3		2	No
712	Makassar	1	30.5	2014-04-07	UNK		3	No
713	Makassar	1	18.7	2014-04-08	Salmonella typhi		3	No
714	Makassar	2	55.3	2014-04-09	UNK		8	Yes
715	Makassar	1	24.11	2014-04-21	Chikungunya	Typhoid fever	4	No
716	Makassar	2	22.1	2014-04-24	Mycobacterium tuberculosis		7	No
717	Makassar	1	53.8	2014-04-29	Klebsiella pneumoniae		4	No
718	Makassar	1	20.11	2014-05-02	DENV-2		4	No
719	Makassar	2	61.11	2014-05-08	UNK		2	No
720	Makassar	1	18.3	2014-05-10	DENV-3		6	No
721	Makassar	1	55.1	2014-05-15	Mycobacterium tuberculosis		Onset date unknown	Yes
722	Makassar	1	23.4	2014-05-19	DENV-3		2	No
723	Makassar	2	22.11	2014-05-27	UNK		15	No
724	Makassar	2	21.8	2014-05-28	Salmonella typhi		3	No
725	Makassar	1	40.4	2014-05-28	Rickettsia typhi		2	No
726	Makassar	1	19.8	2014-05-30	DENV-3		3	No
727	Makassar	1	23.9	2014-06-06	UNK		3	No
728	Makassar	2	24.4	2014-06-14	DENV-3		7	No
729	Makassar	1	21.4	2014-06-16	Salmonella typhi		3	No
730	Makassar	1	18.4	2014-06-26	Influenza B		3	No
731	Makassar	2	36.7	2014-06-30	UNK		8	No
732	Makassar	1	23.7	2014-07-07	UNK		5	No
733	Makassar	1	45.8	2014-07-16	Mycobacterium tuberculosis		8	No
734	Makassar	1	20.6	2014-07-18	DENV-3		1	No
735	Makassar	1	28.4	2014-07-22	Measles virus		4	No
736	Makassar	2	19.7	2014-07-24	DENV-3		8	No
737	Makassar	1	20	2014-07-28	Mycobacterium tuberculosis		Onset date unknown	Yes
738	Makassar	2	40.7	2014-09-01	Enterococcus faecalis		3	No
739	Makassar	2	23.9	2014-09-15	UNK		1	No
740	Makassar	2	19.3	2014-09-16	UNK		2	No
741	Makassar	2	20.8	2014-09-18	Mycobacterium tuberculosis		Onset date unknown	No
742	Makassar	1	45.8	2014-09-23	UNK		3	No
743	Makassar	2	22.2	2014-09-25	UNK		3	No
744	Makassar	2	52.7	2014-09-26	Streptococcus pneumoniae		2	No
745	Makassar	2	47.1	2014-10-27	UNK		14	Yes
746	Makassar	2	18.6	2014-11-05	UNK		1	No
747	Makassar	1	24.1	2014-11-11	Rickettsia typhi		6	No
748	Makassar	1	40.1	2014-11-12	UNK		2	No
749	Makassar	2	20.2	2014-11-14	UNK		5	No
750	Makassar	2	76.1	2014-11-26	Klebsiella pneumoniae		5	No
751	Makassar	2	41.11	2014-12-03	Mycobacterium tuberculosis		2	Yes
752	Makassar	2	58.9	2014-12-22	Staphylococcus aureus		8	No
753	Makassar	2	20.5	2014-12-29	Chikungunya	Typhoid fever	2	No
754	Makassar	2	25	2015-01-08	Escherichia coli		4	No
755	Makassar	2	60.4	2015-01-12	Leptospira (N)		3	Yes
756	Makassar	2	54.9	2015-02-12	Chikungunya	Typhoid fever	3	No
757	Makassar	1	27.2	2015-02-26	Leptospira		5	No
758	Makassar	2	19	2015-02-27	DENV-3		4	No
759	Makassar	1	22.4	2015-03-16	Leptospira		4	No
760	Makassar	2	20.3	2015-03-18	Chikungunya	Typhoid fever	1	No
761	Makassar	1	25.8	2015-03-28	UNK		7	No
762	Makassar	1	22.1	2015-04-03	DENV-3		2	No
763	Makassar	1	24.8	2015-04-03	DENV-3		4	No
764	Makassar	1	22.7	2015-04-07	DENV-3		5	No
765	Makassar	2	40.1	2015-04-08	Salmonella typhi		8	No
766	Makassar	2	18.11	2015-04-09	DENV-1		5	No
767	Makassar	2	28.2	2015-04-21	UNK		2	Yes
768	Makassar	1	19.1	2015-05-04	Salmonella typhi		11	No
769	Makassar	1	20.6	2015-05-09	Chikungunya	Dengue	4	No
770	Makassar	1	23.11	2015-05-11	DENV-3		5	No
771	Makassar	2	26.8	2015-05-15	Malaria		4	No
772	Makassar	1	18.9	2015-05-19	DENV		4	No
773	Makassar	1	21.3	2015-06-14	DENV-2		2	No
774	Makassar	1	20.4	2015-06-16	Chikungunya	Typhoid fever	2	No
775	Makassar	2	37.11	2015-06-27	DENV-2		3	No
776	Makassar	1	19.8	2015-07-11	DENV-1		5	No
777	Makassar	1	25.11	2015-08-05	UNK		6	No
778	Makassar	1	70.7	2015-08-12	UNK		1	No
779	Makassar	1	42.5	2015-11-21	UNK		4	Yes
780	Makassar	1	45.2	2015-11-30	UNK		3	No
781	Makassar	2	50.11	2015-12-01	UNK		3	No
782	Makassar	2	31.1	2015-12-09	UNK		5	No
783	Makassar	1	19.8	2016-01-04	DENV-3		2	No
784	Makassar	1	21	2016-01-11	DENV-1		3	No
785	Makassar	1	41.3	2016-01-11	UNK		4	Yes
786	Makassar	1	20.2	2016-02-08	Chikungunya	Dengue	1	No
787	Makassar	1	27.8	2016-02-09	UNK		7	No
788	Makassar	2	18.11	2016-02-09	UNK		4	No
789	Makassar	1	51.5	2016-02-12	Chikungunya	Dengue	2	No
790	Makassar	1	22.6	2016-02-13	DENV-3		2	No
791	Makassar	2	18.1	2016-02-13	DENV		5	No
792	Makassar	2	22.1	2016-02-14	Salmonella typhi		3	No
793	Makassar	1	26.1	2016-02-16	DENV-3		5	No
794	Makassar	2	19.2	2016-02-15	DENV		4	No
795	Makassar	1	27.8	2016-02-17	DENV-2		3	No
796	Makassar	2	26.11	2016-02-17	DENV-3		6	No
797	Makassar	1	35.1	2016-02-19	Influenza B		2	No
798	Makassar	1	27.9	2016-02-19	DENV-3		3	No
799	Makassar	1	34.5	2016-02-25	UNK		4	Yes
800	Makassar	1	22.1	2016-02-25	DENV-2		11	No
801	Makassar	1	26.5	2016-02-26	DENV-2		4	No
802	Makassar	2	18.3	2016-02-29	UNK		5	No
803	Makassar	2	19.11	2016-02-29	DENV-3		2	No
804	Makassar	1	31.2	2016-03-10	DENV-2		4	No
805	Makassar	2	20.6	2016-03-10	UNK		4	No
806	Makassar	2	25.3	2016-03-30	DENV-2		3	No
807	Makassar	1	20.4	2016-04-11	DENV-3		4	No
808	Makassar	1	38.4	2016-04-14	UNK		6	No
809	Makassar	2	25.6	2016-04-14	UNK		2	No
810	Makassar	1	19.1	2016-05-15	DENV-2		2	No
811	Makassar	1	21.1	2016-05-16	DENV-3		4	No
812	Makassar	2	19.11	2016-05-17	DENV-3		2	No
813	Makassar	2	26.9	2016-05-19	DENV-3		5	No
814	Makassar	1	19.8	2016-05-19	UNK		5	No
815	Makassar	2	30.8	2016-05-21	Rickettsia typhi		2	No
816	Makassar	2	18	2016-05-22	DENV-3		4	No
817	Makassar	2	22.2	2016-05-22	DENV-4		3	No
818	Makassar	2	23.8	2016-06-12	DENV-1		2	No
819	Makassar	2	37.11	2016-06-14	UNK		4	No
820	Makassar	1	21.11	2016-06-16	DENV-3		6	No
821	Makassar	2	29.11	2016-06-20	UNK		2	No
822	Makassar	2	64.2	2016-06-26	DENV-3		5	No
823	Makassar	1	24	2016-06-29	UNK		1	No
824	Makassar	1	28.9	2016-06-30	Leptospira		2	No
825	Semarang	1	13.1	2013-08-22	DENV-1		5	No
826	Semarang	2	3.3	2013-08-26	UNK		12	No
827	Semarang	2	1.5	2013-09-06	Chikungunya	Rash	2	No
828	Semarang	1	4.7	2013-09-09	DENV-2		10	No
829	Semarang	2	11.11	2013-09-12	Salmonella typhi		9	No
830	Semarang	1	6	2013-09-16	DENV-1		Withdraw	No
831	Semarang	1	8.5	2013-09-19	UNK		8	No
832	Semarang	2	5	2013-10-02	Measles virus		11	No
833	Semarang	1	3.4	2013-10-04	UNK		1	No
834	Semarang	1	11.7	2013-10-08	DENV-3		4	No
835	Semarang	1	7.3	2013-10-09	Entamoeba histolytica		4	No
836	Semarang	1	9.2	2013-10-10	DENV-3		5	No
837	Semarang	2	4.11	2013-11-22	UNK		3	No
838	Semarang	2	15.1	2013-11-22	DENV		4	No
839	Semarang	2	1	2013-11-27	UNK		2	No
840	Semarang	1	14.11	2013-12-10	Leptospira		3	No
841	Semarang	2	13.9	2013-12-18	DENV-3		4	No
842	Semarang	2	9.11	2013-12-18	DENV-3		4	No
843	Semarang	2	6.5	2013-12-20	Rickettsia typhi		7	No
844	Semarang	2	12.1	2013-12-30	Chikungunya	Fever	4	No
845	Semarang	1	2.5	2014-01-02	UNK		6	No
846	Semarang	2	12.7	2014-01-03	Rickettsia typhi		5	No
847	Semarang	1	5.4	2014-01-03	UNK		2	No
848	Semarang	1	15.3	2014-01-06	Salmonella typhi		6	No
849	Semarang	1	4.7	2014-01-13	Influenza A		6	No
850	Semarang	2	14.2	2014-01-18	Rickettsia typhi		6	No
851	Semarang	2	6.4	2014-01-30	DENV		5	No
852	Semarang	1	2.9	2014-02-12	DENV-3		1	No
853	Semarang	1	5.4	2014-02-13	Chikungunya	Respiraory infection	5	No
854	Semarang	2	3.2	2014-02-18	DENV-2		4	No
855	Semarang	1	17.8	2014-02-18	Salmonella typhi		8	No
856	Semarang	2	5.11	2014-02-20	DENV-2		3	No
857	Semarang	1	8.1	2014-02-28	DENV-1		5	No
858	Semarang	1	3.9	2014-03-01	Chikungunya	Fever	2	No
859	Semarang	1	3.5	2014-03-07	UNK		2	No
860	Semarang	2	16.6	2014-03-24	Salmonella paratyphi A		6	No
861	Semarang	2	5.1	2014-04-14	DENV-3		3	No
862	Semarang	2	7.2	2014-04-17	DENV-3		4	No
863	Semarang	2	1.4	2014-04-23	Chikungunya	Dengue	1	No
864	Semarang	1	10	2014-05-09	Salmonella paratyphi A		4	No
865	Semarang	2	2.1	2014-06-05	UNK		6	No
866	Semarang	2	11.7	2014-06-27	DENV		6	No
867	Semarang	1	3.9	2014-07-04	Influenza A		3	No
868	Semarang	1	3.2	2014-07-09	UNK		2	No
869	Semarang	2	15.6	2014-07-19	Salmonella typhi		5	No
870	Semarang	2	9.5	2014-07-20	Chikungunya	Dengue	4	No
871	Semarang	2	7.2	2014-08-07	Salmonella typhi		7	No
872	Semarang	2	3.2	2014-08-11	Chikungunya	Fever	1	No
873	Semarang	2	1.5	2014-08-13	UNK		2	No
874	Semarang	1	5.7	2014-08-23	Rickettsia typhi		5	No
875	Semarang	1	2.7	2014-08-28	UNK		3	No
876	Semarang	1	1.5	2014-09-01	UNK		1	No
877	Semarang	1	13.5	2014-09-04	Rickettsia typhi		5	No
878	Semarang	1	8.8	2014-09-18	DENV-3		5	No
879	Semarang	2	6.11	2014-09-20	Rickettsia typhi		7	No
880	Semarang	2	7.2	2014-10-03	DENV		3	No
881	Semarang	2	6.1	2014-10-09	UNK		4	No
882	Semarang	2	3.3	2014-10-20	DENV		6	No
883	Semarang	1	5.2	2014-10-25	DENV		4	No
884	Semarang	1	3.8	2014-10-29	Influenza B		8	No
885	Semarang	1	3.9	2014-10-31	Influenza A		3	No
886	Semarang	2	3.4	2014-11-08	UNK		4	No
887	Semarang	1	9.6	2014-11-08	Salmonella typhi		5	No
888	Semarang	1	6.3	2014-11-11	UNK		15	No
889	Semarang	2	5.3	2014-11-14	UNK		2	No
890	Semarang	2	2.1	2014-11-19	HHV-6		4	No
891	Semarang	1	11.6	2014-11-28	UNK		11	No
892	Semarang	1	7.8	2014-12-02	Streptococcus pneumoniae		12	No
893	Semarang	1	6	2014-12-04	UNK		7	No
894	Semarang	2	8.6	2014-12-17	DENV-3		3	No
895	Semarang	1	16.1	2014-12-19	DENV-2		4	No
896	Semarang	2	16.8	2014-12-20	UNK		5	No
897	Semarang	1	8.5	2014-12-27	UNK		4	No
898	Semarang	2	8.8	2015-01-01	UNK		6	No
899	Semarang	2	9.2	2015-01-10	DENV-3		5	No
900	Semarang	1	2.2	2015-01-10	DENV-1		5	No
901	Semarang	1	8.2	2015-01-13	DENV-3		4	No
902	Semarang	1	11	2015-01-19	Influenza A		2	No
903	Semarang	1	3.3	2015-01-19	Influenza A		1	No
904	Semarang	2	5.9	2015-01-21	UNK		8	No
905	Semarang	1	9	2015-01-26	DENV-1		7	No
906	Semarang	2	8.7	2015-01-27	DENV-1		5	No
907	Semarang	1	9.9	2015-02-09	Leptospira		11	No
908	Semarang	1	17.7	2015-03-03	DENV		6	No
909	Semarang	2	7.5	2015-03-09	DENV-1		4	No
910	Semarang	1	15.9	2015-03-13	Salmonella typhi		4	No
911	Semarang	2	4.6	2015-03-25	DENV		6	No
912	Semarang	1	2.2	2015-03-31	DENV-3		4	No
913	Semarang	1	17.11	2015-04-08	DENV-3		5	No
914	Semarang	2	7.5	2015-04-15	UNK		4	No
915	Semarang	2	12.2	2015-04-21	DENV-2		5	No
916	Semarang	2	16.4	2015-04-27	UNK		4	No
917	Semarang	1	11.7	2015-04-28	UNK		5	No
918	Semarang	1	15.11	2015-05-04	DENV-3		3	No
919	Semarang	1	12.1	2015-05-04	DENV-1		4	No
920	Semarang	2	13.5	2015-05-06	Rubella		9	No
921	Semarang	2	14.6	2015-05-06	DENV-1		3	No
922	Semarang	1	15.3	2015-05-08	DENV-3		4	No
923	Semarang	2	17.1	2015-06-10	UNK		5	No
924	Semarang	2	17.5	2015-06-12	DENV		5	No
925	Semarang	1	1.2	2015-06-13	UNK		2	No
926	Semarang	1	1.1	2015-06-16	UNK		2	No
927	Semarang	2	1	2015-06-26	HHV-6		2	No
928	Semarang	2	7.5	2015-07-25	DENV-3		8	No
929	Semarang	1	1.2	2015-08-27	HHV-6		1	No
930	Semarang	2	2.6	2015-10-01	UNK		5	No
931	Semarang	1	3.2	2015-10-12	Entamoeba coli		1	No
932	Semarang	2	5.11	2015-10-26	UNK		4	No
933	Semarang	1	13.5	2015-11-18	Rickettsia typhi		4	No
934	Semarang	2	17.2	2015-12-28	UNK		12	No
935	Semarang	2	4.11	2016-01-25	DENV-3		5	No
936	Semarang	1	7.5	2016-02-04	UNK		5	No
937	Semarang	2	8.2	2016-03-08	DENV-3		5	No
938	Semarang	2	7.11	2016-03-10	DENV		6	No
939	Semarang	1	2.6	2016-03-11	DENV-3		5	No
940	Semarang	1	14.3	2016-03-14	DENV-1		4	No
941	Semarang	1	12.3	2016-04-07	DENV-2		4	No
942	Semarang	1	3.5	2016-05-02	UNK		8	No
943	Semarang	1	5.3	2016-05-25	DENV-2		3	No
944	Semarang	1	1.7	2016-06-02	UNK		2	No
945	Semarang	1	1	2016-06-17	DENV-3		3	No
946	Semarang	1	61.7	2013-08-23	UNK		5	No
947	Semarang	2	44.2	2013-08-29	Escherichia coli		8	No
948	Semarang	2	79.8	2013-09-05	EPEC		3	No
949	Semarang	1	34.1	2013-09-05	DENV-4		4	No
950	Semarang	1	29.3	2013-09-12	Salmonella typhi		5	No
951	Semarang	1	18	2013-09-26	Salmonella typhi		3	No
952	Semarang	1	23.6	2013-09-30	Salmonella paratyphi A		4	No
953	Semarang	2	46.5	2013-10-01	Pseudomonas aeruginosa		5	No
954	Semarang	1	18.6	2013-10-09	DENV		5	No
955	Semarang	1	53.1	2013-10-10	UNK		11	No
956	Semarang	2	20.9	2013-10-21	Salmonella paratyphi A		3	No
957	Semarang	1	18.11	2013-10-22	Influenza A		11	No
958	Semarang	1	20.6	2013-10-25	Chikungunya	Typhoid fever	6	No
959	Semarang	2	25.3	2013-10-28	Salmonella typhi		7	No
960	Semarang	2	48.4	2013-10-28	UNK		4	No
961	Semarang	2	45.4	2013-10-29	Influenza A		7	No
962	Semarang	2	21.3	2013-10-29	Salmonella paratyphi A		7	No
963	Semarang	1	29.6	2013-11-08	Rickettsia typhi		4	No
964	Semarang	1	33.7	2013-11-09	Rickettsia typhi		5	No
965	Semarang	2	54	2013-11-13	Chikungunya	Typhoid fever	1	No
966	Semarang	1	31.9	2013-11-16	Entamoeba coli		4	No
967	Semarang	2	59.1	2013-11-29	UNK		5	No
968	Semarang	2	83.1	2013-12-02	Chikungunya	Respiraory infection	2	No
969	Semarang	1	21.7	2013-12-05	Salmonella paratyphi A		5	No
970	Semarang	2	47.11	2013-12-12	Rickettsia typhi		6	No
971	Semarang	1	56.4	2013-12-19	Klebsiella pneumoniae		6	No
972	Semarang	2	80.11	2013-12-20	UNK		3	No
973	Semarang	1	22.1	2013-12-21	Rickettsia typhi		8	No
974	Semarang	2	53.9	2013-12-21	Rickettsia typhi		5	No
975	Semarang	1	22	2013-12-27	Rickettsia typhi		9	No
976	Semarang	2	73.4	2013-12-31	Leptospira		5	No
977	Semarang	1	55.11	2014-01-04	Salmonella typhi		2	No
978	Semarang	1	48.11	2014-01-10	UNK		8	No
979	Semarang	2	24.4	2014-01-10	DENV-2		3	No
980	Semarang	2	56.11	2014-01-18	UNK		5	No
981	Semarang	1	37.6	2014-01-20	Rickettsia typhi		7	No
982	Semarang	1	53	2014-01-27	Staphylococcus aureus		8	No
983	Semarang	1	37.2	2014-01-27	Chikungunya	Leptospirosis	6	No
984	Semarang	1	36.8	2014-02-01	UNK		4	No
985	Semarang	2	62.1	2014-02-04	Leptospira		3	No
986	Semarang	1	33.11	2014-02-05	Leptospira		6	No
987	Semarang	1	20.8	2014-02-06	Leptospira		6	No
988	Semarang	2	19	2014-02-06	DENV		6	No
989	Semarang	1	41.7	2014-02-14	Leptospira		4	No
990	Semarang	1	29.3	2014-02-15	Leptospira		5	No
991	Semarang	2	56.9	2014-02-17	Leptospira		8	No
992	Semarang	2	41.7	2014-02-18	Leptospira		4	No
993	Semarang	2	50.5	2014-02-20	Leptospira		4	No
994	Semarang	2	57.11	2014-02-20	UNK		6	No
995	Semarang	1	20.1	2014-02-27	UNK		5	No
996	Semarang	2	42.1	2014-03-05	Escherichia coli		4	No
997	Semarang	1	92.3	2014-03-18	UNK		4	No
998	Semarang	2	20.2	2014-03-20	DENV		5	No
999	Semarang	1	41.7	2014-04-07	UNK		4	No
1000	Semarang	1	20.5	2014-04-10	UNK		7	No
1001	Semarang	2	21.5	2014-04-14	UNK		5	No
1002	Semarang	2	34.7	2014-04-15	UNK		7	No
1003	Semarang	2	23	2014-04-14	Salmonella typhi		7	No
1004	Semarang	2	54.7	2014-04-22	UNK		5	No
1005	Semarang	1	33.11	2014-04-25	UNK		8	No
1006	Semarang	2	28.4	2014-05-02	UNK		5	No
1007	Semarang	2	50.4	2014-05-12	UNK		2	No
1008	Semarang	1	36	2014-05-31	UNK		6	No
1009	Semarang	1	72.5	2014-06-09	UNK		6	Yes
1010	Semarang	2	29.5	2014-06-13	UNK		4	No
1011	Semarang	1	44.2	2014-06-30	UNK		3	No
1012	Semarang	1	32.1	2014-07-10	DENV-1		5	No
1013	Semarang	2	59.7	2014-08-14	Leptospira		4	No
1014	Semarang	1	63.7	2014-08-19	Mycobacterium tuberculosis		11	Yes
1015	Semarang	2	20	2014-08-30	Salmonella typhi		8	No
1016	Semarang	2	25.2	2014-09-23	Salmonella typhi		7	No
1017	Semarang	2	27.8	2014-10-03	Salmonella typhi		9	No
1018	Semarang	1	45.4	2014-10-06	UNK		6	No
1019	Semarang	1	35.1	2014-10-09	UNK		8	No
1020	Semarang	2	55.9	2014-10-14	Leptospira		8	No
1021	Semarang	1	63	2014-10-20	Rickettsia typhi		7	No
1022	Semarang	2	19.4	2014-10-21	Rickettsia typhi		4	No
1023	Semarang	2	60.1	2014-10-22	UNK		8	No
1024	Semarang	1	42.5	2014-11-10	UNK		4	No
1025	Semarang	1	68.1	2014-11-14	Mycobacterium tuberculosis		15	No
1026	Semarang	1	44.1	2014-11-15	UNK		8	No
1027	Semarang	2	46.7	2014-11-17	UNK		6	No
1028	Semarang	1	43.5	2014-12-03	Salmonella typhi		6	No
1029	Semarang	1	50.5	2014-12-04	Rickettsia typhi		8	No
1030	Semarang	1	48.3	2014-12-10	UNK		2	No
1031	Semarang	1	52.2	2014-12-13	Mycobacterium tuberculosis		3	No
1032	Semarang	2	45.9	2014-12-19	Influenza A		2	No
1033	Semarang	1	76.1	2015-01-07	UNK		4	No
1034	Semarang	1	34.7	2015-01-08	Rickettsia typhi		5	No
1035	Semarang	1	48.7	2015-01-09	Rickettsia felis		4	No
1036	Semarang	1	39.4	2015-01-19	Rickettsia typhi		9	No
1037	Semarang	2	59.9	2015-01-23	UNK		3	No
1038	Semarang	2	58.9	2015-02-02	UNK		2	No
1039	Semarang	2	41.1	2015-02-03	Salmonella typhi		7	No
1040	Semarang	1	38.4	2015-02-10	DENV		8	No
1041	Semarang	1	36.1	2015-02-13	DENV-3		5	No
1042	Semarang	1	45	2015-03-02	DENV-3		4	No
1043	Semarang	2	22.9	2015-03-10	UNK		7	No
1044	Semarang	2	31.9	2015-03-18	UNK		8	No
1045	Semarang	1	38.5	2015-03-25	UNK		3	No
1046	Semarang	1	54.9	2015-04-02	Leptospira		6	No
1047	Semarang	1	49.11	2015-04-14	UNK		5	No
1048	Semarang	2	20.2	2015-04-22	UNK		4	No
1049	Semarang	2	64.8	2015-05-06	UNK		2	No
1050	Semarang	2	44.7	2015-06-05	UNK		5	No
1051	Semarang	2	55.5	2015-06-10	UNK		4	No
1052	Semarang	1	24	2015-06-11	Salmonella typhi		4	No
1053	Semarang	2	20.11	2015-07-29	UNK		8	No
1054	Semarang	2	60.7	2015-08-04	UNK		15	Yes
1055	Semarang	2	23.1	2015-08-20	Influenza A		5	No
1056	Semarang	2	24.6	2015-09-02	Salmonella typhi		7	No
1057	Semarang	2	19.1	2015-09-07	DENV-3		5	No
1058	Semarang	1	38.1	2015-09-10	Salmonella typhi		9	No
1059	Semarang	2	25.11	2015-09-21	UNK		4	No
1060	Semarang	1	61.11	2015-09-22	UNK		8	No
1061	Semarang	2	18.9	2015-09-28	Influenza A		3	No
1062	Semarang	1	20.9	2015-09-29	UNK		6	No
1063	Semarang	1	25.9	2015-11-06	Influenza A		4	No
1064	Semarang	2	35.1	2015-11-09	UNK		3	No
1065	Semarang	1	35.5	2015-11-25	Klebsiella pneumoniae		4	No
1066	Semarang	2	22.2	2015-12-01	UNK		3	Yes
1067	Semarang	1	73.6	2015-12-17	Entamoeba coli		1	No
1068	Semarang	1	44.5	2015-12-28	UNK		8	No
1069	Semarang	1	25.2	2016-02-02	Influenza B		4	No
1070	Semarang	1	33.4	2016-02-29	DENV-2		3	No
1071	Semarang	1	18.7	2016-03-04	DENV		5	No
1072	Semarang	2	44.1	2016-03-15	Rickettsia typhi		5	No
1073	Semarang	2	52.1	2016-03-16	Influenza B		15	No
1074	Semarang	2	52.8	2016-03-18	Influenza B		4	No
1075	Semarang	1	21.8	2016-03-20	DENV		6	No
1076	Semarang	1	19.3	2016-03-29	DENV-3		8	No
1077	Semarang	2	20.2	2016-03-30	DENV-2		4	No
1078	Semarang	2	21.4	2016-04-20	DENV		13	No
1079	Semarang	1	18.3	2016-05-23	DENV-2		5	No
1080	Surabaya	1	4.7	2014-01-07	UNK		3	No
1081	Surabaya	1	7.4	2014-01-07	UNK		3	No
1082	Surabaya	2	1.6	2014-01-08	UNK		2	No
1083	Surabaya	1	2.8	2014-01-16	UNK		2	No
1084	Surabaya	1	14.2	2014-01-23	UNK		4	No
1085	Surabaya	1	1.5	2014-01-23	UNK		2	No
1086	Surabaya	1	1.1	2014-01-23	UNK		1	No
1087	Surabaya	1	3.2	2014-01-24	UNK		8	No
1088	Surabaya	2	9.5	2014-01-30	Salmonella typhi		8	No
1089	Surabaya	2	4.4	2014-01-31	UNK		5	No
1090	Surabaya	2	1.3	2014-02-01	UNK		Onset date unknown	No
1091	Surabaya	2	5	2014-03-06	Salmonella sp		7	No
1092	Surabaya	2	12.9	2014-03-06	Salmonella typhi		4	No
1093	Surabaya	2	17.4	2014-03-07	Hepatitis A		4	No
1094	Surabaya	1	5.4	2014-03-11	Salmonella typhi		14	No
1095	Surabaya	2	11.2	2014-03-18	DENV		5	No
1096	Surabaya	2	2.9	2014-03-30	RSV		2	No
1097	Surabaya	1	14.1	2014-04-08	DENV-3		6	No
1098	Surabaya	1	7	2014-04-08	UNK		4	No
1099	Surabaya	1	9.1	2014-05-07	Salmonella paratyphi A		3	No
1100	Surabaya	1	2	2014-06-02	Measles virus		13	No
1101	Surabaya	1	6.9	2014-06-03	Influenza A		4	No
1102	Surabaya	1	5.1	2014-06-03	UNK		4	No
1103	Surabaya	2	16	2014-06-04	DENV-2		3	No
1104	Surabaya	2	7	2014-06-24	UNK		6	Yes
1105	Surabaya	1	10.1	2014-07-01	Influenza A		3	No
1106	Surabaya	1	13	2014-07-01	DENV		4	No
1107	Surabaya	1	17.5	2014-07-12	Salmonella typhi		2	No
1108	Surabaya	2	10	2014-07-15	DENV		4	No
1109	Surabaya	2	2.11	2014-07-16	DENV-2		3	No
1110	Surabaya	1	14.1	2014-07-18	Chikungunya	Dengue	3	No
1111	Surabaya	1	2.8	2014-07-21	DENV-3		4	No
1112	Surabaya	1	5.9	2014-08-05	UNK		6	No
1113	Surabaya	1	15.2	2014-08-12	DENV		4	No
1114	Surabaya	2	5.7	2014-08-27	Chikungunya	Dengue	3	No
1115	Surabaya	2	12.11	2014-09-12	Salmonella typhi		6	No
1116	Surabaya	2	4	2014-10-02	Measles virus		7	No
1117	Surabaya	2	16.6	2014-10-03	UNK		4	No
1118	Surabaya	1	1.1	2014-10-06	Rickettsia typhi		6	No
1119	Surabaya	1	4.6	2014-10-31	Salmonella paratyphi A		3	No
1120	Surabaya	2	17.7	2014-11-09	Salmonella typhi		7	No
1121	Surabaya	1	7.9	2014-12-21	UNK		1	No
1122	Surabaya	1	5.4	2014-12-29	UNK		2	No
1123	Surabaya	1	5.2	2014-12-29	Salmonella typhi		7	No
1124	Surabaya	1	8.8	2014-12-30	UNK		1	No
1125	Surabaya	1	13	2014-12-30	Leptospira		6	No
1126	Surabaya	1	7.4	2015-01-22	UNK		5	No
1127	Surabaya	1	11.8	2015-01-23	DENV-1		4	No
1128	Surabaya	1	9	2015-01-23	DENV-2		6	No
1129	Surabaya	1	15.8	2015-01-24	Chikungunya	Dengue	2	No
1130	Surabaya	1	16.9	2015-02-02	UNK		5	No
1131	Surabaya	1	14.11	2015-02-18	Chikungunya	Dengue	2	No
1132	Surabaya	1	10	2015-02-20	DENV-3		5	No
1133	Surabaya	1	5.1	2015-03-02	Influenza A H3N2		2	No
1134	Surabaya	1	5.7	2015-03-06	DENV-3		4	No
1135	Surabaya	2	15.5	2015-03-09	DENV		3	No
1136	Surabaya	2	12	2015-03-10	DENV-3		5	No
1137	Surabaya	1	15.3	2015-03-14	DENV-2		4	No
1138	Surabaya	2	15.1	2015-03-14	DENV-2		3	No
1139	Surabaya	2	3.1	2015-03-16	Influenza A		6	No
1140	Surabaya	2	10	2015-03-19	DENV-2		3	No
1141	Surabaya	2	16	2015-03-23	UNK		2	No
1142	Surabaya	1	13.2	2015-03-25	Rickettsia typhi		Onset date unknown	No
1143	Surabaya	1	11.6	2015-03-31	DENV-2		4	No
1144	Surabaya	2	10.5	2015-04-16	DENV-2		4	No
1145	Surabaya	1	16.5	2015-04-17	DENV-3		5	No
1146	Surabaya	2	6.11	2015-04-28	DENV		4	No
1147	Surabaya	2	16.3	2015-05-06	DENV-3		4	No
1148	Surabaya	1	16	2015-05-07	DENV-3		3	No
1149	Surabaya	1	8.8	2015-05-08	DENV-2		5	No
1150	Surabaya	1	17.11	2015-06-04	DENV-3		4	No
1151	Surabaya	2	17.1	2015-06-15	DENV-3		5	No
1152	Surabaya	1	15.6	2015-06-23	Rickettsia typhi		5	No
1153	Surabaya	2	17.11	2015-06-30	DENV-2		5	No
1154	Surabaya	2	6.6	2015-08-24	DENV-3		5	No
1155	Surabaya	1	17.9	2015-10-08	Rickettsia typhi		8	No
1156	Surabaya	2	14.11	2015-12-16	Hepatitis A		6	No
1157	Surabaya	1	1.1	2016-01-18	UNK		1	No
1158	Surabaya	1	16.8	2016-02-03	DENV-1		4	No
1159	Surabaya	2	15.6	2016-04-05	Salmonella sp		5	No
1160	Surabaya	1	15	2016-04-18	DENV		5	No
1161	Surabaya	1	15.9	2016-04-20	DENV-2		4	No
1162	Surabaya	2	16.3	2016-05-31	DENV-3		5	No
1163	Surabaya	1	15.8	2016-06-07	DENV-2		3	No
1164	Surabaya	1	19.2	2014-01-03	Leptospira		3	No
1165	Surabaya	2	22.5	2014-01-08	UNK		2	No
1166	Surabaya	2	22	2014-01-21	UNK		7	No
1167	Surabaya	1	44	2014-01-22	DENV-2		9	No
1168	Surabaya	2	98	2014-01-22	DENV-1&2		1	No
1169	Surabaya	1	23	2014-01-23	DENV-2		9	No
1170	Surabaya	2	80	2014-01-27	DENV-2		1	No
1171	Surabaya	1	18.5	2014-01-30	UNK		4	No
1172	Surabaya	1	22.11	2014-01-30	Salmonella typhi		Onset date unknown	No
1173	Surabaya	2	40.11	2014-01-31	UNK		1	No
1174	Surabaya	1	38	2014-02-03	UNK		3	No
1175	Surabaya	2	45	2014-02-03	UNK		6	No
1176	Surabaya	2	20.6	2014-02-04	Rickettsia typhi		5	No
1177	Surabaya	1	36.1	2014-02-04	Rickettsia typhi		8	Yes
1178	Surabaya	1	30.7	2014-02-21	Salmonella typhi		1	Yes
1179	Surabaya	1	46	2014-02-27	Rickettsia typhi		5	No
1180	Surabaya	1	55	2014-03-03	Leptospira		5	No
1181	Surabaya	1	41.8	2014-03-03	Rickettsia typhi		4	No
1182	Surabaya	2	34.7	2014-03-14	UNK		6	No
1183	Surabaya	2	76.1	2014-03-14	Escherichia coli		1	No
1184	Surabaya	2	60	2014-03-17	UNK		1	No
1185	Surabaya	1	24	2014-03-31	Chikungunya	Enteritis	2	No
1186	Surabaya	1	59.11	2014-04-08	Rickettsia typhi		7	Yes
1187	Surabaya	2	28.6	2014-04-10	UNK		3	No
1188	Surabaya	1	63.1	2014-04-28	UNK		1	No
1189	Surabaya	1	18.11	2014-05-20	DENV-2		4	No
1190	Surabaya	2	19	2014-05-23	Influenza B		3	No
1191	Surabaya	1	23.7	2014-06-04	DENV-4		5	Yes
1192	Surabaya	2	85	2014-06-05	Leptospira		4	No
1193	Surabaya	1	53	2014-06-09	UNK		6	No
1194	Surabaya	2	51.11	2014-06-11	Rickettsia typhi		2	No
1195	Surabaya	1	21	2014-07-03	Leptospira		3	No
1196	Surabaya	2	43	2014-07-04	Salmonella typhi		7	No
1197	Surabaya	2	28	2014-07-17	Salmonella typhi		1	No
1198	Surabaya	1	28.9	2014-07-25	UNK		1	Yes
1199	Surabaya	1	28.6	2014-07-25	UNK		5	Yes
1200	Surabaya	2	23.8	2014-08-04	Salmonella typhi		7	No
1201	Surabaya	2	21.7	2014-08-10	Measles virus		8	No
1202	Surabaya	1	29.9	2014-08-19	UNK		7	Yes
1203	Surabaya	2	18.3	2014-08-28	DENV		5	No
1204	Surabaya	1	27.3	2014-08-29	UNK		2	No
1205	Surabaya	1	28.7	2014-09-17	UNK		1	No
1206	Surabaya	1	27.8	2014-09-24	Rickettsia typhi		9	No
1207	Surabaya	2	56.3	2014-10-04	UNK		2	Yes
1208	Surabaya	1	58.3	2014-10-06	UNK		1	No
1209	Surabaya	2	26.1	2014-10-13	UNK		8	No
1210	Surabaya	1	59.1	2014-10-14	UNK		8	No
1211	Surabaya	1	44.4	2014-10-18	Rickettsia typhi		6	No
1212	Surabaya	2	50	2014-10-29	Escherichia coli		2	No
1213	Surabaya	1	34.11	2014-11-12	UNK		7	No
1214	Surabaya	1	35.2	2014-11-17	Rickettsia typhi		6	No
1215	Surabaya	1	20.4	2014-11-29	Rickettsia typhi		7	No
1216	Surabaya	1	51	2014-11-29	Rickettsia typhi		5	Yes
1217	Surabaya	1	40.4	2014-11-30	Rickettsia typhi		9	No
1218	Surabaya	1	30.4	2014-12-02	UNK		2	No
1219	Surabaya	1	19.9	2014-12-02	DENV-2		3	No
1220	Surabaya	2	19.4	2014-12-05	Rickettsia typhi		5	No
1221	Surabaya	1	19.1	2014-12-10	UNK		5	No
1222	Surabaya	1	20.7	2014-12-16	DENV-2		7	No
1223	Surabaya	1	19.2	2014-12-16	DENV-2		5	No
1224	Surabaya	1	30.8	2014-12-16	UNK		4	No
1225	Surabaya	1	37.2	2015-01-15	Leptospira		3	No
1226	Surabaya	2	43.6	2015-01-16	UNK		5	No
1227	Surabaya	1	20.2	2015-01-16	Hepatitis A		5	No
1228	Surabaya	1	18.1	2015-02-02	DENV-2		6	No
1229	Surabaya	1	27.7	2015-02-02	UNK		4	No
1230	Surabaya	1	38.5	2015-02-20	Salmonella sp		5	No
1231	Surabaya	1	56	2015-02-26	Chikungunya	Enteritis	1	No
1232	Surabaya	1	48	2015-03-06	Leptospira		3	Yes
1233	Surabaya	2	23.8	2015-03-10	UNK		4	No
1234	Surabaya	2	34	2015-03-10	UNK		4	No
1235	Surabaya	1	21.3	2015-03-14	DENV-3		3	No
1236	Surabaya	1	20.3	2015-03-19	DENV-3		4	No
1237	Surabaya	2	34	2015-03-31	DENV-2		2	No
1238	Surabaya	1	37.11	2015-03-31	Chikungunya	Dengue	3	No
1239	Surabaya	2	22	2015-04-08	Salmonella typhi		4	No
1240	Surabaya	2	28.6	2015-04-21	Acinetobacter baumanii		3	No
1241	Surabaya	1	49	2015-04-22	UNK		5	No
1242	Surabaya	1	21	2015-04-28	DENV		5	No
1243	Surabaya	1	48.11	2015-05-06	DENV-3		2	No
1244	Surabaya	2	20	2015-05-13	UNK		4	No
1245	Surabaya	2	59.1	2015-05-20	UNK		3	No
1246	Surabaya	1	40.1	2015-05-22	Rickettsia typhi		10	No
1247	Surabaya	1	27	2015-05-22	Salmonella typhi		6	No
1248	Surabaya	1	57.7	2015-05-23	Klebsiella pneumoniae		3	Yes
1249	Surabaya	1	59.8	2015-05-26	UNK		3	No
1250	Surabaya	2	19.11	2015-06-15	UNK		3	No
1251	Surabaya	2	57.5	2015-06-24	Salmonella typhi		2	No
1252	Surabaya	1	21.11	2015-07-01	UNK		7	No
1253	Surabaya	1	21.1	2015-07-01	UNK		10	No
1254	Surabaya	1	18	2015-07-02	UNK		4	No
1255	Surabaya	1	26.1	2015-07-15	UNK		4	No
1256	Surabaya	2	26	2015-07-23	UNK		6	No
1257	Surabaya	2	30.2	2015-07-30	UNK		3	No
1258	Surabaya	2	64.1	2015-08-03	UNK		9	No
1259	Surabaya	2	23.3	2015-08-03	UNK		5	No
1260	Surabaya	1	56.6	2015-08-05	UNK		4	No
1261	Surabaya	2	29.3	2015-08-11	Rickettsia typhi		7	No
1262	Surabaya	1	21	2015-08-31	UNK		4	No
1263	Surabaya	1	34	2015-09-10	Leptospira		4	No
1264	Surabaya	1	24.6	2015-09-14	UNK		4	No
1265	Surabaya	1	24.4	2015-09-16	Hepatitis A		3	No
1266	Surabaya	1	25	2015-09-18	UNK		3	No
1267	Surabaya	1	50	2015-10-22	UNK		5	No
1268	Surabaya	1	54.2	2015-10-22	UNK		5	No
1269	Surabaya	1	33	2015-11-02	Rickettsia typhi		7	No
1270	Surabaya	2	55.7	2015-11-03	UNK		Onset date unknown	No
1271	Surabaya	2	55	2015-11-03	SEOUL VIRUS		4	No
1272	Surabaya	2	70.5	2015-12-04	UNK		3	No
1273	Surabaya	1	40.5	2015-12-10	Rickettsia typhi		5	No
1274	Surabaya	2	27.2	2015-12-14	Rickettsia typhi		3	No
1275	Surabaya	1	60.11	2015-12-17	Rickettsia typhi		8	No
1276	Surabaya	1	47	2015-12-28	UNK		7	No
1277	Surabaya	2	45.4	2016-01-12	Rickettsia typhi		8	No
1278	Surabaya	1	50	2016-01-15	Leptospira		6	No
1279	Surabaya	1	61.1	2016-01-19	Rickettsia typhi		8	No
1280	Surabaya	2	23.1	2016-01-20	DENV-3		6	No
1281	Surabaya	2	50.6	2016-01-27	UNK		7	No
1282	Surabaya	1	19.3	2016-01-29	Rickettsia typhi		7	No
1283	Surabaya	2	18.5	2016-02-16	DENV-2		4	No
1284	Surabaya	2	39	2016-02-24	Influenza A		4	No
1285	Surabaya	1	25	2016-02-26	DENV		4	No
1286	Surabaya	1	65.1	2016-03-10	Streptococcus pneumoniae		1	No
1287	Surabaya	1	22.1	2016-03-11	Salmonella paratyphi A		4	No
1288	Surabaya	2	24.1	2016-03-15	UNK		5	No
1289	Surabaya	1	24.5	2016-03-22	Influenza A		3	No
1290	Surabaya	1	19.4	2016-03-22	Influenza A		5	No
1291	Surabaya	2	61.1	2016-04-04	UNK		4	Yes
1292	Surabaya	1	52.5	2016-04-06	UNK		1	No
1293	Surabaya	2	73.9	2016-04-11	Escherichia coli		7	No
1294	Surabaya	2	19.2	2016-04-27	DENV-2		4	No
1295	Surabaya	1	50	2016-04-29	Leptospira		4	No
1296	Surabaya	2	18.4	2016-05-24	DENV-3		3	No
1297	Surabaya	2	28.6	2016-06-13	DENV-3		4	No
1298	Yogyakarta	1	14.6	2013-08-28	Escherichia coli		3	No
1299	Yogyakarta	2	3.11	2013-09-12	DENV		3	No
1300	Yogyakarta	2	2.6	2013-09-17	UNK		1	Yes
1301	Yogyakarta	1	5.7	2013-09-18	Acinetobacter baumanii		4	No
1302	Yogyakarta	1	7.5	2013-09-24	DENV-1		5	No
1303	Yogyakarta	1	12.5	2013-10-02	DENV-3		12	No
1304	Yogyakarta	1	13	2013-10-07	DENV-4		5	No
1305	Yogyakarta	1	1.1	2013-10-11	DENV-1		1	No
1306	Yogyakarta	2	5.5	2013-11-01	Rickettsia typhi		11	No
1307	Yogyakarta	1	3	2013-11-22	UNK		2	No
1308	Yogyakarta	2	7.1	2013-12-17	UNK		1	No
1309	Yogyakarta	1	1.8	2013-12-19	DENV-1		4	No
1310	Yogyakarta	2	2	2013-12-23	HHV-6		4	No
1311	Yogyakarta	1	1.9	2014-01-02	UNK		1	No
1312	Yogyakarta	1	2.6	2014-01-07	UNK		1	No
1313	Yogyakarta	2	3.6	2014-01-16	UNK		1	No
1314	Yogyakarta	1	6.2	2014-01-16	DENV-1		4	No
1315	Yogyakarta	2	4.2	2014-02-13	UNK		4	No
1316	Yogyakarta	2	1.5	2014-03-04	UNK		1	No
1317	Yogyakarta	1	4.8	2014-03-11	Salmonella typhi		8	Yes
1318	Yogyakarta	2	2.6	2014-03-25	UNK		5	No
1319	Yogyakarta	1	4.1	2014-04-02	DENV-1		4	No
1320	Yogyakarta	1	2	2014-05-05	Chikungunya	Fever	Onset date unknown	No
1321	Yogyakarta	1	12.6	2014-05-06	UNK		2	No
1322	Yogyakarta	2	1.4	2014-05-12	Pseudomonas aeruginosa		12	No
1323	Yogyakarta	1	17.8	2014-05-16	DENV-2		3	No
1324	Yogyakarta	2	1.1	2014-06-05	UNK		13	Yes
1325	Yogyakarta	2	17.1	2013-09-20	DENV		5	No
1326	Yogyakarta	2	1.5	2014-06-18	RSV		2	No
1327	Yogyakarta	2	3.7	2014-06-19	DENV-2		2	No
1328	Yogyakarta	1	6.6	2014-06-20	DENV-1		2	No
1329	Yogyakarta	1	5.9	2014-06-25	DENV-3		5	No
1330	Yogyakarta	1	3	2014-07-02	Measles virus		6	No
1331	Yogyakarta	2	7.9	2014-07-19	DENV-3		4	No
1332	Yogyakarta	2	5.2	2014-07-30	Influenza A		1	No
1333	Yogyakarta	1	5.4	2014-08-12	DENV-3		4	No
1334	Yogyakarta	1	2.4	2014-08-26	UNK		7	No
1335	Yogyakarta	1	1.3	2014-09-03	UNK		5	No
1336	Yogyakarta	2	1.1	2014-09-16	UNK		1	No
1337	Yogyakarta	1	4.3	2014-09-26	UNK		2	No
1338	Yogyakarta	1	8.1	2014-10-01	Pseudomonas aeruginosa		3	No
1339	Yogyakarta	1	12.6	2014-10-20	UNK		7	No
1340	Yogyakarta	2	4	2014-10-29	UNK		6	No
1341	Yogyakarta	2	1.2	2014-11-11	HHV-6		3	No
1342	Yogyakarta	1	1.2	2014-12-11	UNK		1	No
1343	Yogyakarta	2	2.1	2015-01-06	UNK		2	No
1344	Yogyakarta	2	2.7	2015-01-07	DENV-1		5	No
1345	Yogyakarta	2	1.3	2015-01-14	UNK		1	No
1346	Yogyakarta	1	1.2	2015-01-23	RSV-B		5	No
1347	Yogyakarta	2	5.3	2015-01-30	Leptospira		4	No
1348	Yogyakarta	2	15.2	2015-02-16	DENV-3, Enterococcus faecalis		2	No
1349	Yogyakarta	1	11.2	2015-02-16	DENV-3		2	No
1350	Yogyakarta	1	9.7	2015-02-17	DENV-1		4	No
1351	Yogyakarta	2	1	2015-02-23	Meta pneumovirus		6	No
1352	Yogyakarta	1	5.1	2015-02-25	UNK		6	No
1353	Yogyakarta	2	16.9	2015-03-11	DENV-4		5	No
1354	Yogyakarta	2	11.11	2015-03-16	DENV		5	No
1355	Yogyakarta	2	3.8	2015-03-25	DENV-3		4	No
1356	Yogyakarta	2	3.7	2015-03-26	DENV-1		4	No
1357	Yogyakarta	1	1.7	2015-04-15	RSV-A		3	No
1358	Yogyakarta	1	7.7	2015-04-17	DENV-2		4	No
1359	Yogyakarta	2	7.3	2015-05-13	DENV-1		4	No
1360	Yogyakarta	1	1	2015-05-18	Klebsiella pneumoniae		5	No
1361	Yogyakarta	2	10.5	2015-05-25	DENV-3		2	No
1362	Yogyakarta	1	9.1	2015-06-08	Rickettsia typhi		5	No
1363	Yogyakarta	1	1	2015-06-24	DENV-2		2	No
1364	Yogyakarta	2	3	2015-07-03	Adenovirus		4	No
1365	Yogyakarta	2	16.1	2015-07-24	DENV-3		3	No
1366	Yogyakarta	1	14.8	2015-07-24	DENV-3		2	No
1367	Yogyakarta	1	4	2015-08-05	Cor43		5	No
1368	Yogyakarta	1	5.8	2015-08-26	UNK		5	No
1369	Yogyakarta	1	2.4	2015-09-18	UNK		5	No
1370	Yogyakarta	2	7.8	2015-09-22	Bordetella pertussis, Streptococcus pneumoniae		7	No
1371	Yogyakarta	1	4.7	2015-09-28	UNK		7	No
1372	Yogyakarta	1	11.11	2015-10-05	DENV-1		3	No
1373	Yogyakarta	2	15.2	2015-10-05	DENV-1		4	No
1374	Yogyakarta	2	5.3	2015-10-19	UNK		2	No
1375	Yogyakarta	1	1.4	2015-11-13	Enterovirus		7	No
1376	Yogyakarta	2	3.5	2015-11-16	UNK		3	No
1377	Yogyakarta	2	3.5	2015-11-25	UNK		2	No
1378	Yogyakarta	1	5	2015-12-04	Measles virus		5	No
1379	Yogyakarta	1	4.1	2015-12-11	Klebsiella pneumoniae		6	No
1380	Yogyakarta	1	16.5	2016-01-25	Influenza B		7	No
1381	Yogyakarta	1	4.7	2016-02-19	UNK		2	No
1382	Yogyakarta	1	16.3	2016-03-02	Chikungunya	Fever	2	No
1383	Yogyakarta	1	7.6	2016-03-08	DENV-2		3	No
1384	Yogyakarta	2	4.6	2016-03-21	RSV		3	No
1385	Yogyakarta	1	14.8	2016-04-22	DENV-3		5	No
1386	Yogyakarta	2	3.4	2016-05-17	UNK		2	No
1387	Yogyakarta	2	3.1	2016-05-27	HHV-6		3	No
1388	Yogyakarta	1	9.1	2016-06-03	DENV-3		3	No
1389	Yogyakarta	2	3.8	2016-06-10	DENV-3		5	No
1390	Yogyakarta	1	61.3	2013-09-12	UNK		5	No
1391	Yogyakarta	2	26.7	2013-09-16	Salmonella typhi		13	No
1392	Yogyakarta	1	35.1	2013-09-23	DENV-1		3	No
1393	Yogyakarta	2	40.2	2013-09-28	UNK		3	No
1394	Yogyakarta	1	38.6	2013-10-05	UNK		3	No
1395	Yogyakarta	1	31.2	2013-10-07	Salmonella typhi		11	No
1396	Yogyakarta	2	20.1	2013-10-08	UNK		5	No
1397	Yogyakarta	1	46.4	2013-10-09	UNK		2	No
1398	Yogyakarta	1	25.1	2013-10-11	Leptospira		2	No
1399	Yogyakarta	2	44.5	2013-11-01	Staphylococcus aureus		4	No
1400	Yogyakarta	1	36.5	2013-11-27	Pseudomonas aeruginosa		3	Yes
1401	Yogyakarta	1	54.6	2013-12-04	Rickettsia typhi		5	No
1402	Yogyakarta	2	44.8	2013-12-18	UNK		10	Yes
1403	Yogyakarta	2	19.3	2014-01-14	UNK		4	No
1404	Yogyakarta	1	75	2014-01-15	Rickettsia typhi		5	Yes
1405	Yogyakarta	1	25.7	2014-01-28	UNK		7	No
1406	Yogyakarta	2	25.2	2014-04-21	Pseudomonas aeruginosa		14	No
1407	Yogyakarta	1	30.1	2014-04-25	UNK		10	No
1408	Yogyakarta	1	70.11	2014-05-13	Acinetobacter baumanii		8	No
1409	Yogyakarta	2	69	2014-05-30	UNK		3	No
1410	Yogyakarta	1	38.5	2014-06-03	Mycobacterium tuberculosis		8	No
1411	Yogyakarta	2	23.6	2014-06-03	UNK		2	No
1412	Yogyakarta	1	38.1	2014-06-10	Escherichia coli		1	Yes
1413	Yogyakarta	2	71.8	2014-06-17	UNK		8	No
1414	Yogyakarta	1	27.6	2014-06-26	UNK		2	No
1415	Yogyakarta	1	58.11	2014-07-01	UNK		7	No
1416	Yogyakarta	2	71.7	2014-07-24	UNK		1	No
1417	Yogyakarta	1	68.7	2014-08-05	M leprae		11	No
1418	Yogyakarta	1	46.7	2014-08-14	UNK		2	Yes
1419	Yogyakarta	1	45.7	2014-08-20	Mycobacterium tuberculosis		5	No
1420	Yogyakarta	1	54.9	2014-08-27	Streptococcus faecalis		7	No
1421	Yogyakarta	1	62.5	2014-09-10	Leptospira		4	No
1422	Yogyakarta	2	45.1	2014-09-15	UNK		7	No
1423	Yogyakarta	2	71.9	2014-09-30	Escherichia coli		2	No
1424	Yogyakarta	1	52.1	2014-10-28	Streptococcus pneumoniae		1	No
1425	Yogyakarta	2	19.1	2014-11-13	UNK		3	No
1426	Yogyakarta	2	78.1	2014-11-21	UNK		2	Yes
1427	Yogyakarta	2	69	2014-12-30	UNK		2	No
1428	Yogyakarta	1	60	2015-01-05	Pseudomonas aeruginosa		1	No
1429	Yogyakarta	1	22.4	2015-02-10	DENV-2		4	No
1430	Yogyakarta	1	58.7	2015-02-11	UNK		1	No
1431	Yogyakarta	2	53.4	2015-02-17	UNK		4	No
1432	Yogyakarta	1	53.3	2015-02-26	Enterococcus faecalis		1	No
1433	Yogyakarta	1	23.6	2015-03-04	Salmonella sp		11	Yes
1434	Yogyakarta	1	34.11	2015-03-06	Mycobacterium tuberculosis		3	Yes
1435	Yogyakarta	2	30.11	2015-03-20	Mycobacterium tuberculosis		6	Yes
1436	Yogyakarta	1	27.1	2015-03-24	UNK		2	No
1437	Yogyakarta	1	25.3	2015-03-31	Pseudomonas aeruginosa		10	No
1438	Yogyakarta	2	21	2015-04-23	DENV-3		4	No
1439	Yogyakarta	1	61.6	2015-05-07	UNK		3	No
1440	Yogyakarta	2	61.4	2015-05-08	Leptospira		7	No
1441	Yogyakarta	2	48.4	2015-06-09	Streptococcus pneumoniae		1	No
1442	Yogyakarta	2	74.6	2015-07-01	UNK		4	Yes
1443	Yogyakarta	1	70.1	2015-08-28	Influenza A		4	No
1444	Yogyakarta	1	19.9	2015-09-02	Rickettsia typhi		4	No
1445	Yogyakarta	2	20.5	2015-11-12	Rickettsia typhi		4	No
1446	Yogyakarta	1	77.6	2015-12-10	Escherichia coli		9	No
1447	Yogyakarta	1	69.1	2016-01-07	Klebsiella pneumoniae		2	No
1448	Yogyakarta	1	26.9	2016-01-11	UNK		3	No
1449	Yogyakarta	1	59	2016-01-12	UNK		6	No
1450	Yogyakarta	1	26	2016-01-13	DENV-3		5	No
1451	Yogyakarta	1	33.9	2016-01-13	M leprae		1	No
1452	Yogyakarta	1	25.1	2016-01-13	DENV-2		5	No
1453	Yogyakarta	1	64.4	2016-01-29	Leptospira		5	No
1454	Yogyakarta	1	22	2016-02-04	DENV-3		4	No
1455	Yogyakarta	1	19.1	2016-02-15	DENV-2		5	No
1456	Yogyakarta	1	78.1	2016-02-16	Influenza A		6	No
1457	Yogyakarta	1	77.8	2016-03-07	Influenza A H3N2		3	No
1458	Yogyakarta	2	33.1	2016-03-21	UNK		4	No
1459	Yogyakarta	1	66.6	2016-03-29	DENV-4		2	No
1460	Yogyakarta	1	21.3	2016-03-31	DENV-4		3	No
1461	Yogyakarta	2	59.4	2016-05-12	Influenza B		8	Yes
1462	Yogyakarta	2	20.1	2016-05-16	DENV-2		4	No
1463	Yogyakarta	1	62.3	2016-05-17	DENV-1		6	Yes
1464	Yogyakarta	2	56.3	2016-06-06	UNK		3	No
